# Supplementary material for: miRNA profile is altered in a modified EAE mouse model of multiple sclerosis featuring cortical lesions
Source: eLife. 2020 Sep 17;9:e56916. doi: 10.7554/eLife.56916 (PMC7498263; doi:10.7554/eLife.56916)
Supplement: Source data 1. [file elife-56916-data1.xlsx]

## Sheet: CTL
Well	Well Position	Target Name	CT
1	A1	mmu-let-7b-000378	28.7486
2	A2	mmu-let-7c-000379	26.6647
3	A3	mmu-let-7d-002283	28.208
4	A4	mmu-let-7e-002406	25.5869
5	A5	mmu-let-7g-002282	26.0271
6	A6	mmu-let-7i-002221	26.5851
7	A7	mmu-miR-1-002222	34.5639
8	A8	rno-miR-1-002064	34.3674
9	A9	mmu-miR-7a-000268	32.4444
10	A10	mmu-miR-7b-002555	31.3962
11	A11	U6 snRNA-001973	17.3939
12	A12	U6 snRNA-001973	17.362
13	A13	mmu-miR-9-000583	21.8604
14	A14	mmu-miR-10a-000387	36.5261
15	A15	mmu-miR-10b-002218	Undetermined
16	A16	mmu-miR-15a-000389	30.2797
17	A17	mmu-miR-15b-000390	32.1956
18	A18	mmu-miR-16-000391	21.971
19	A19	rno-miR-17-3p-002078	33.117
20	A20	mmu-miR-18a-002422	34.6809
21	A21	mmu-miR-18b-002466	Undetermined
22	A22	mmu-miR-19a-000395	30.326
23	A23	mmu-miR-19b-000396	26.5162
24	A24	mmu-miR-20a-000580	29.3082
25	B1	mmu-miR-20b-001014	34.5823
26	B2	rno-miR-20b-3p-002052	Undetermined
27	B3	mmu-miR-21-000397	29.385
28	B4	mmu-miR-23b-000400	31.6246
29	B5	mmu-miR-24-000402	21.9697
30	B6	mmu-miR-25-000403	34.8885
31	B7	mmu-miR-26a-000405	23.926
32	B8	mmu-miR-26b-000407	27.1401
33	B9	mmu-miR-27a-000408	31.0037
34	B10	mmu-miR-27b-000409	31.4845
35	B11	U6 snRNA-001973	17.1466
36	B12	U6 snRNA-001973	17.3063
37	B13	mmu-miR-28-000411	33.7053
38	B14	mmu-miR-29b-000413	29.4096
39	B15	mmu-miR-29c-000587	28.4028
40	B16	mmu-miR-30b-000602	24.5443
41	B17	mmu-miR-30c-000419	23.4247
42	B18	mmu-miR-30d-000420	26.5112
43	B19	mmu-miR-32-002109	35.3946
44	B20	mmu-miR-34a-000426	29.8797
45	B21	mmu-miR-34c-000428	31.9719
46	B22	mmu-miR-93-001090	29.2882
47	B23	mmu-miR-96-000186	Undetermined
48	B24	mmu-miR-98-000577	32.7859
49	C1	mmu-miR-99a-000435	27.4548
50	C2	mmu-miR-99b-000436	28.0136
51	C3	mmu-miR-100-000437	27.4357
52	C4	mmu-miR-101a-002253	30.3524
53	C5	mmu-miR-103-000439	28.6256
54	C6	mmu-miR-105-002465	Undetermined
55	C7	mmu-miR-107-000443	32.02
56	C8	mmu-miR-122-002245	Undetermined
57	C9	mmu-miR-124-001182	26.3014
58	C10	mmu-miR-125a-3p-002199	32.246
59	C11	mmu-miR-125a-5p-002198	23.9941
60	C12	mmu-miR-125b-5p-000449	24.7707
61	C13	mmu-miR-126-3p-002228	21.899
62	C14	mmu-miR-126-5p-000451	27.9826
63	C15	mmu-miR-127-000452	26.2024
64	C16	mmu-miR-128a-002216	27.3655
65	C17	mmu-miR-129-3p-001184	26.4715
66	C18	mmu-miR-130a-000454	32.7244
67	C19	mmu-miR-130b-000456	33.7435
68	C20	mmu-miR-132-000457	22.4418
69	C21	mmu-miR-133a-002246	27.3252
70	C22	mmu-miR-133b-002247	33.6816
71	C23	mmu-miR-134-001186	27.4867
72	C24	mmu-miR-135a-000460	28.9108
73	D1	mmu-miR-135b-002261	28.0441
74	D2	mmu-miR-136-002511	26.2281
75	D3	mmu-miR-137-001129	28.4691
76	D4	mmu-miR-138-002284	21.1315
77	D5	mmu-miR-139-3p-002546	28.4234
78	D6	mmu-miR-139-5p-002289	23.1936
79	D7	mmu-miR-140-001187	26.9267
80	D8	mmu-miR-141-000463	33.8014
81	D9	mmu-miR-142-3p-000464	31.062
82	D10	mmu-miR-142-5p-002248	35.704
83	D11	snoRNA135-001230	29.4296
84	D12	mmu-miR-145-002278	27.1974
85	D13	mmu-miR-146a-000468	25.436
86	D14	mmu-miR-146b-001097	25.4713
87	D15	mmu-miR-147-002262	Undetermined
88	D16	mmu-miR-148a-000470	32.1688
89	D17	mmu-miR-148b-000471	33.9791
90	D18	mmu-miR-150-000473	24.3024
91	D19	mmu-miR-151-3p-001190	30.156
92	D20	mmu-miR-152-000475	31.6321
93	D21	mmu-miR-153-001191	35.367
94	D22	mmu-miR-154-000477	34.1438
95	D23	mmu-miR-181a-000480	28.6229
96	D24	mmu-miR-181c-000482	33.1663
97	E1	mmu-miR-182-002599	29.9484
98	E2	mmu-miR-183-002269	37.0333
99	E3	mmu-miR-184-000485	30.0659
100	E4	mmu-miR-185-002271	30.6525
101	E5	mmu-miR-186-002285	26.4046
102	E6	mmu-miR-190-000489	34.1953
103	E7	mmu-miR-191-002299	21.9157
104	E8	mmu-miR-192-000491	30.139
105	E9	mmu-miR-193-002250	32.5483
106	E10	mmu-miR-193b-002467	25.2539
107	E11	mmu-miR-194-000493	31.2672
108	E12	mmu-miR-195-000494	27.3563
109	E13	mmu-miR-196b-002215	Undetermined
110	E14	rno-miR-196c-002049	34.1483
111	E15	mmu-miR-197-000497	Undetermined
112	E16	mmu-miR-199a-3p-002304	32.103
113	E17	mmu-miR-199a-5p-000498	Undetermined
114	E18	mmu-miR-200a-000502	28.2007
115	E19	mmu-miR-200b-002251	28.3064
116	E20	mmu-miR-200c-002300	29.1755
117	E21	mmu-miR-201-002578	Undetermined
118	E22	mmu-miR-202-3p-001195	34.8259
119	E23	mmu-miR-202-5p-002579	Undetermined
120	E24	mmu-miR-203-000507	29.4048
121	F1	mmu-miR-204-000508	25.1447
122	F2	mmu-miR-205-000509	Undetermined
123	F3	mmu-miR-207-001198	Undetermined
124	F4	rno-miR-207-001315	33.0929
125	F5	mmu-miR-208-000511	Undetermined
126	F6	mmu-miR-208b-002290	Undetermined
127	F7	mmu-miR-210-000512	28.0605
128	F8	mmu-miR-211-001199	33.731
129	F9	mmu-miR-214-002306	33.4678
130	F10	mmu-miR-215-001200	33.9717
131	F11	snoRNA202-001232	24.3889
132	F12	mmu-miR-216a-002220	34.6055
133	F13	mmu-miR-216b-002326	35.1416
134	F14	mmu-miR-217-002556	35.0592
135	F15	mmu-miR-218-000521	23.6303
136	F16	mmu-miR-219-000522	30.4812
137	F17	mmu-miR-220-002468	Undetermined
138	F18	mmu-miR-221-000524	28.3832
139	F19	mmu-miR-222-002276	21.6145
140	F20	mmu-miR-223-002295	28.8938
141	F21	mmu-miR-224-002553	33.9812
142	F22	mmu-miR-290-3p-002591	Undetermined
143	F23	mmu-miR-291a-3p-002592	Undetermined
144	F24	mmu-miR-291b-5p-002537	Undetermined
145	G1	mmu-miR-292-3p-002593	Undetermined
146	G2	mmu-miR-293-001794	Undetermined
147	G3	mmu-miR-294-001056	Undetermined
148	G4	mmu-miR-295-000189	Undetermined
149	G5	mmu-miR-296-3p-002101	36.0562
150	G6	mmu-miR-296-5p-000527	31.3609
151	G7	mmu-miR-297c-002480	Undetermined
152	G8	mmu-miR-297b-5p-001626	Undetermined
153	G9	mmu-miR-298-002598	31.2192
154	G10	mmu-miR-301a-000528	28.1774
155	G11	mmu-miR-301b-002600	29.9703
156	G12	mmu-miR-302a-000529	34.8609
157	G13	mmu-miR-302c-002558	Undetermined
158	G14	mmu-miR-302d-000535	Undetermined
159	G15	mmu-miR-320-002277	25.6511
160	G16	mmu-miR-323-3p-002227	28.5016
161	G17	mmu-miR-324-5p-000539	31.9371
162	G18	mmu-miR-325-002510	Undetermined
163	G19	rno-miR-327-001328	34.6009
164	G20	mmu-miR-328-000543	27.1649
165	G21	mmu-miR-329-000192	Undetermined
166	G22	mmu-miR-330-002230	32.9613
167	G23	mmu-miR-331-3p-000545	25.5059
168	G24	mmu-miR-331-5p-002233	34.4037
169	H1	rno-miR-333-001329	Undetermined
170	H2	mmu-miR-335-3p-002185	30.1136
171	H3	mmu-miR-335-5p-000546	28.2633
172	H4	rno-miR-336-001331	Undetermined
173	H5	mmu-miR-337-3p-002532	32.0809
174	H6	mmu-miR-337-5p-002515	29.3342
175	H7	mmu-miR-338-3p-002252	31.5559
176	H8	mmu-miR-339-3p-002533	29.1873
177	H9	rno-miR-339-3p-002059	32.225
178	H10	mmu-miR-339-5p-002257	32.8596
179	H11	U87-001712	Undetermined
180	H12	mmu-miR-340-3p-002259	31.1263
181	H13	mmu-miR-340-5p-002258	29.7709
182	H14	mmu-miR-342-3p-002260	22.2027
183	H15	mmu-miR-342-5p-002527	30.8999
184	H16	rno-miR-343-001344	Undetermined
185	H17	mmu-miR-344-001063	29.1143
186	H18	rno-miR-344-3p-001332	34.1365
187	H19	rno-miR-344-5p-002060	34.9268
188	H20	mmu-miR-345-3p-002529	Undetermined
189	H21	rno-miR-345-3p-002061	33.3435
190	H22	mmu-miR-345-5p-002528	32.6058
191	H23	mmu-miR-346-001064	34.3448
192	H24	rno-miR-346-001333	32.2729
193	I1	rno-miR-347-001334	30.2088
194	I2	rno-miR-349-001335	Undetermined
195	I3	mmu-miR-350-002530	33.2241
196	I4	rno-miR-351-002063	34.9636
197	I5	mmu-miR-361-000554	31.6439
198	I6	mmu-miR-362-3p-002616	35.0798
199	I7	mmu-miR-363-001271	Undetermined
200	I8	mmu-miR-365-001020	30.9822
201	I9	mmu-miR-367-000555	Undetermined
202	I10	mmu-miR-369-3p-000557	33.818
203	I11	mmu-miR-369-5p-001021	31.4464
204	I12	mmu-miR-370-002275	28.2755
205	I13	mmu-miR-375-000564	32.9717
206	I14	mmu-miR-376a-001069	27.8759
207	I15	mmu-miR-376b-002452	30.8798
208	I16	mmu-miR-376c-002450	30.312
209	I17	mmu-miR-377-000566	Undetermined
210	I18	rno-miR-377-001320	Undetermined
211	I19	mmu-miR-379-001138	27.8486
212	I20	mmu-miR-380-3p-001071	35.3346
213	I21	mmu-miR-380-5p-002601	29.0278
214	I22	mmu-miR-381-000571	Undetermined
215	I23	mmu-miR-382-000572	26.4202
216	I24	mmu-miR-383-001767	26.5863
217	J1	mmu-miR-384-3p-002603	32.401
218	J2	mmu-miR-384-5p-002602	24.1876
219	J3	mmu-miR-409-3p-002332	26.3532
220	J4	mmu-miR-409-5p-002331	32.947
221	J5	mmu-miR-410-001274	26.8118
222	J6	mmu-miR-411-001610	26.4676
223	J7	rno-miR-421-001343	Undetermined
224	J8	mmu-miR-423-5p-002340	Undetermined
225	J9	mmu-miR-425-001516	33.3001
226	J10	mmu-miR-429-001077	27.0601
227	J11	Y1-001727	Undetermined
228	J12	mmu-miR-431-001979	27.0508
229	J13	mmu-miR-433-001028	27.4237
230	J14	mmu-miR-434-3p-002604	25.3238
231	J15	mmu-miR-434-5p-002581	33.4167
232	J16	mmu-miR-448-001029	34.2719
233	J17	mmu-miR-449a-001030	31.2791
234	J18	mmu-miR-449b-002539	Undetermined
235	J19	mmu-miR-450a-5p-002303	Undetermined
236	J20	mmu-miR-450b-5p-001962	Undetermined
237	J21	mmu-miR-451-001141	32.1745
238	J22	mmu-miR-453-002484	Undetermined
239	J23	mmu-miR-455-002455	Undetermined
240	J24	mmu-miR-465a-3p-002040	Undetermined
241	K1	mmu-miR-465a-5p-001082	Undetermined
242	K2	mmu-miR-465b-5p-002485	Undetermined
243	K3	rno-miR-466b-002066	Undetermined
244	K4	rno-miR-466c-002067	Undetermined
245	K5	mmu-miR-466h-002516	Undetermined
246	K6	mmu-miR-467a-002587	31.5418
247	K7	mmu-miR-467c-002517	35.1205
248	K8	mmu-miR-467d-002518	Undetermined
249	K9	mmu-miR-467e-002568	33.3646
250	K10	mmu-miR-470-002588	Undetermined
251	K11	mmu-miR-484-001821	23.12
252	K12	mmu-miR-486-001278	28.0441
253	K13	mmu-miR-487b-001285	28.6866
254	K14	mmu-miR-489-001302	31.9619
255	K15	mmu-miR-491-001630	28.5629
256	K16	mmu-miR-493-002519	35.2598
257	K17	mmu-miR-494-002365	28.9769
258	K18	mmu-miR-495-001663	28.3931
259	K19	mmu-miR-497-001346	32.1317
260	K20	mmu-miR-499-001352	Undetermined
261	K21	mmu-miR-500-002606	31.8959
262	K22	mmu-miR-501-3p-001651	33.6111
263	K23	mmu-miR-503-002456	34.2608
264	K24	mmu-miR-504-002084	Undetermined
265	L1	mmu-miR-505-001655	Undetermined
266	L2	mmu-miR-509-3p-002521	Undetermined
267	L3	mmu-miR-509-5p-002520	Undetermined
268	L4	mmu-miR-511-002549	Undetermined
269	L5	mmu-miR-532-3p-002355	30.0624
270	L6	mmu-miR-532-5p-001518	28.4495
271	L7	rno-miR-532-5p-002051	29.6844
272	L8	mmu-miR-539-001286	26.8614
273	L9	mmu-miR-540-3p-001310	31.8392
274	L10	mmu-miR-540-5p-002561	35.086
275	L11	ath-miR159a-000338	Undetermined
276	L12	mmu-miR-542-3p-001284	Undetermined
277	L13	mmu-miR-542-5p-002563	34.8975
278	L14	mmu-miR-543-002376	31.4904
279	L15	rno-miR-543-002065	Undetermined
280	L16	mmu-miR-544-002550	30.0149
281	L17	mmu-miR-551b-001535	33.656
282	L18	mmu-miR-574-3p-002349	27.5795
283	L19	mmu-miR-582-3p-002567	35.4004
284	L20	mmu-miR-582-5p-002566	35.2325
285	L21	mmu-miR-590-5p-001984	Undetermined
286	L22	mmu-miR-598-002476	31.9772
287	L23	rno-miR-598-5p-002053	34.6169
288	L24	mmu-miR-615-3p-001960	Undetermined
289	M1	mmu-miR-615-5p-002353	Undetermined
290	M2	mmu-miR-654-3p-002239	Undetermined
291	M3	mmu-miR-654-5p-002522	Undetermined
292	M4	mmu-miR-665-002607	Undetermined
293	M5	mmu-miR-666-5p-001952	32.0229
294	M6	mmu-miR-669a-001683	34.9519
295	M7	mmu-miR-671-3p-002322	33.0566
296	M8	mmu-miR-672-002327	27.699
297	M9	rno-miR-673-002054	36.2431
298	M10	mmu-miR-674-002021	30.6891
299	M11	mmu-miR-708-002341	28.8922
300	M12	mmu-miR-741-002457	Undetermined
301	M13	mmu-miR-742-002038	Undetermined
302	M14	rno-miR-742-002055	Undetermined
303	M15	mmu-miR-743b-3p-002471	Undetermined
304	M16	mmu-miR-743b-5p-002470	Undetermined
305	M17	mmu-miR-743a-002469	Undetermined
306	M18	rno-miR-743b-002068	Undetermined
307	M19	mmu-miR-744-002324	28.6891
308	M20	rno-miR-758-001990	31.993
309	M21	rno-miR-760-5p-002057	Undetermined
310	M22	mmu-miR-770-3p-002027	32.9589
311	M23	mmu-miR-802-002029	Undetermined
312	M24	mmu-miR-871-002354	Undetermined
313	N1	rno-miR-871-002069	Undetermined
314	N2	mmu-miR-872-002264	30.0732
315	N3	mmu-miR-873-002356	Undetermined
316	N4	mmu-miR-874-002268	32.946
317	N5	mmu-miR-875-3p-002547	Undetermined
318	N6	mmu-miR-876-3p-002464	Undetermined
319	N7	mmu-miR-876-5p-002463	Undetermined
320	N8	rno-miR-878-002070	Undetermined
321	N9	mmu-miR-878-5p-002540	Undetermined
322	N10	mmu-miR-879-002472	Undetermined
323	N11	mmu-miR-881-002609	Undetermined
324	N12	rno-miR-881-002072	Undetermined
325	N13	mmu-miR-883a-3p-002461	Undetermined
326	N14	mmu-miR-883b-3p-002565	Undetermined
327	N15	mmu-miR-883a-5p-002611	Undetermined
328	N16	mmu-miR-125b-3p-002378	34.0298
329	N17	mmu-miR-143-002249	29.6996
330	N18	rno-miR-219-1-3p-002077	Undetermined
331	N19	rno-miR-219-2-3p-002390	32.4201
332	N20	rno-miR-224-000599	Undetermined
333	N21	mmu-miR-324-3p-002509	29.5353
334	N22	mmu-miR-351-001067	33.5868
335	N23	rno-miR-381-001322	31.9977
336	N24	rno-miR-409-5p-001317	Undetermined
337	O1	rno-miR-450a-001345	Undetermined
338	O2	mmu-miR-452-001032	Undetermined
339	O3	mmu-miR-464-001081	Undetermined
340	O4	mmu-miR-467b-001671	31.6876
341	O5	mmu-miR-468-001085	Undetermined
342	O6	mmu-miR-469-001086	Undetermined
343	O7	mmu-miR-488-001659	32.3063
344	O8	mmu-miR-490-001037	32.4266
345	O9	mmu-miR-496-001953	Undetermined
346	O10	rno-miR-505-001316	Undetermined
347	O11	mmu-miR-546-001312	Undetermined
348	O12	mmu-miR-547-002564	34.3692
349	O13	mmu-miR-652-002352	28.5263
350	O14	mmu-miR-667-001949	26.6241
351	O15	mmu-miR-668-001947	35.234
352	O16	mmu-miR-670-002020	Undetermined
353	O17	mmu-miR-675-3p-001941	Undetermined
354	O18	mmu-miR-675-5p-001940	Undetermined
355	O19	mmu-miR-676-001959	28.2795
356	O20	mmu-miR-677-001660	Undetermined
357	O21	mmu-miR-679-001662	Undetermined
358	O22	mmu-miR-680-001664	33.9447
359	O23	mmu-miR-682-001666	34.9803
360	O24	mmu-miR-683-001668	33.1672
361	P1	mmu-miR-684-001669	Undetermined
362	P2	mmu-miR-685-001670	31.5123
363	P3	mmu-miR-686-001672	Undetermined
364	P4	mmu-miR-687-001674	25.2152
365	P5	mmu-let-7a-000377	29.2586
366	P6	mmu-let-7f-000382	30.0364
367	P7	mmu-miR-106b-000442	30.4033
368	P8	mmu-miR-155-002571	31.5608
369	P9	mmu-miR-17-002308	26.7882
370	P10	mmu-miR-23a-000399	32.531
371	P11	mmu-miR-29a-002112	21.7485
372	P12	mmu-miR-30a-000417	26.0159
373	P13	mmu-miR-30e-002223	25.7801
374	P14	mmu-miR-31-000185	27.0284
375	P15	mmu-miR-34b-3p-002618	27.0147
376	P16	mmu-miR-92a-000430	31.4551
377	P17	rno-miR-190b-002048	34.3782
378	P18	mmu-miR-129-5p-000590	32.5963
379	P19	mmu-miR-187-001193	27.4298
380	P20	mmu-miR-188-3p-002106	Undetermined
381	P21	mmu-miR-106a-002459	28.3789
382	P22	mmu-miR-188-5p-002320	31.9293
383	P23	mmu-miR-302b-000531	35.514
384	P24	mmu-miR-322-001076	32.7333

## Sheet: HIS ipsi
Well	Well Position	Target Name	CT
1	A1
2	A2	mmu-let-7c-000379	24.3589
3	A3	mmu-let-7d-002283	25.1947
4	A4	mmu-let-7e-002406	23.5041
5	A5	mmu-let-7g-002282	23.9432
6	A6	mmu-let-7i-002221	23.9804
7	A7	mmu-miR-1-002222	32.8661
8	A8	rno-miR-1-002064	31.0466
9	A9	mmu-miR-7a-000268	26.3572
10	A10	mmu-miR-7b-002555	26.3159
11	A11	U6 snRNA-001973	17.7797
12	A12	U6 snRNA-001973	18.581
13	A13	mmu-miR-9-000583	19.5064
14	A14	mmu-miR-10a-000387	33.4468
15	A15	mmu-miR-10b-002218	35.4403
16	A16	mmu-miR-15a-000389	27.2689
17	A17	mmu-miR-15b-000390	27.5077
18	A18	mmu-miR-16-000391	22.0176
19	A19	rno-miR-17-3p-002078	32.4053
20	A20	mmu-miR-18a-002422	31.3785
21	A21	mmu-miR-18b-002466	Undetermined
22	A22	mmu-miR-19a-000395	26.4914
23	A23	mmu-miR-19b-000396	22.9076
24	A24	mmu-miR-20a-000580	25.8585
25	B1	mmu-miR-20b-001014	31.8412
26	B2	rno-miR-20b-3p-002052	Undetermined
27	B3	mmu-miR-21-000397	23.7918
28	B4	mmu-miR-23b-000400	28.4404
29	B5	mmu-miR-24-000402	20.9916
30	B6	mmu-miR-25-000403	30.2686
31	B7	mmu-miR-26a-000405	21.5825
32	B8	mmu-miR-26b-000407	24.2758
33	B9	mmu-miR-27a-000408	27.1608
34	B10	mmu-miR-27b-000409	27.0719
35	B11	U6 snRNA-001973	17.9439
36	B12	U6 snRNA-001973	18.5614
37	B13	mmu-miR-28-000411	30.0235
38	B14	mmu-miR-29b-000413	Undetermined
39	B15	mmu-miR-29c-000587	28.1819
40	B16	mmu-miR-30b-000602	22.4339
41	B17	mmu-miR-30c-000419	21.444
42	B18	mmu-miR-30d-000420	25.0097
43	B19	mmu-miR-32-002109	33.927
44	B20	mmu-miR-34a-000426	26.3314
45	B21	mmu-miR-34c-000428	30.1023
46	B22	mmu-miR-93-001090	26.2732
47	B23	mmu-miR-96-000186	34.7808
48	B24	mmu-miR-98-000577	30.7656
49	C1	mmu-miR-99a-000435	24.4877
50	C2	mmu-miR-99b-000436	25.5101
51	C3	mmu-miR-100-000437	24.4636
52	C4	mmu-miR-101a-002253	28.7727
53	C5	mmu-miR-103-000439	26.2707
54	C6	mmu-miR-105-002465	Undetermined
55	C7	mmu-miR-107-000443	29.5662
56	C8	mmu-miR-122-002245	32.3489
57	C9	mmu-miR-124-001182	23.4492
58	C10	mmu-miR-125a-3p-002199	34.2428
59	C11	mmu-miR-125a-5p-002198	25.0558
60	C12	mmu-miR-125b-5p-000449	21.7739
61	C13	mmu-miR-126-3p-002228	21.2026
62	C14	mmu-miR-126-5p-000451	25.332
63	C15	mmu-miR-127-000452	23.2431
64	C16	mmu-miR-128a-002216	23.4412
65	C17	mmu-miR-129-3p-001184	23.8641
66	C18	mmu-miR-130a-000454	29.0529
67	C19	mmu-miR-130b-000456	29.9598
68	C20	mmu-miR-132-000457	20.0151
69	C21	mmu-miR-133a-002246	27.9156
70	C22	mmu-miR-133b-002247	33.8926
71	C23	mmu-miR-134-001186	27.7343
72	C24	mmu-miR-135a-000460	26.4534
73	D1	mmu-miR-135b-002261	25.1223
74	D2	mmu-miR-136-002511	25.2165
75	D3	mmu-miR-137-001129	25.9145
76	D4	mmu-miR-138-002284	22.3134
77	D5	mmu-miR-139-3p-002546	28.1342
78	D6	mmu-miR-139-5p-002289	22.9494
79	D7	mmu-miR-140-001187	25.2763
80	D8	mmu-miR-141-000463	28.745
81	D9	mmu-miR-142-3p-000464	24.968
82	D10	mmu-miR-142-5p-002248	30.6555
83	D11	snoRNA135-001230	26.3876
84	D12	mmu-miR-145-002278	24.2555
85	D13	mmu-miR-146a-000468	23.6166
86	D14	mmu-miR-146b-001097	25.3773
87	D15	mmu-miR-147-002262	32.8333
88	D16	mmu-miR-148a-000470	28.1412
89	D17	mmu-miR-148b-000471	30.3417
90	D18	mmu-miR-150-000473	24.487
91	D19	mmu-miR-151-3p-001190	28.66
92	D20	mmu-miR-152-000475	27.2892
93	D21	mmu-miR-153-001191	31.0109
94	D22	mmu-miR-154-000477	32.4263
95	D23	mmu-miR-181a-000480	25.0173
96	D24	mmu-miR-181c-000482	33.1355
97	E1	mmu-miR-182-002599	29.0432
98	E2	mmu-miR-183-002269	32.8226
99	E3	mmu-miR-184-000485	30.8705
100	E4	mmu-miR-185-002271	28.7336
101	E5	mmu-miR-186-002285	26.8822
102	E6	mmu-miR-190-000489	30.8888
103	E7	mmu-miR-191-002299	22.3027
104	E8	mmu-miR-192-000491	29.3966
105	E9	mmu-miR-193-002250	34.3567
106	E10	mmu-miR-193b-002467	26.2024
107	E11	mmu-miR-194-000493	29.9495
108	E12	mmu-miR-195-000494	24.827
109	E13	mmu-miR-196b-002215	Undetermined
110	E14	rno-miR-196c-002049	35.5588
111	E15	mmu-miR-197-000497	33.6513
112	E16	mmu-miR-199a-3p-002304	29.4363
113	E17	mmu-miR-199a-5p-000498	Undetermined
114	E18	mmu-miR-200a-000502	26.2961
115	E19	mmu-miR-200b-002251	25.6111
116	E20	mmu-miR-200c-002300	24.9663
117	E21	mmu-miR-201-002578	Undetermined
118	E22	mmu-miR-202-3p-001195	32.4198
119	E23	mmu-miR-202-5p-002579	Undetermined
120	E24	mmu-miR-203-000507	27.4698
121	F1	mmu-miR-204-000508	24.341
122	F2	mmu-miR-205-000509	33.5193
123	F3	mmu-miR-207-001198	Undetermined
124	F4	rno-miR-207-001315	33.3487
125	F5	mmu-miR-208-000511	Undetermined
126	F6	mmu-miR-208b-002290	Undetermined
127	F7	mmu-miR-210-000512	27.3758
128	F8	mmu-miR-211-001199	35.1323
129	F9	mmu-miR-214-002306	31.23
130	F10	mmu-miR-215-001200	35.1274
131	F11	snoRNA202-001232	22.1047
132	F12	mmu-miR-216a-002220	34.1171
133	F13	mmu-miR-216b-002326	32.6353
134	F14	mmu-miR-217-002556	33.0886
135	F15	mmu-miR-218-000521	22.2048
136	F16	mmu-miR-219-000522	28.1855
137	F17	mmu-miR-220-002468	Undetermined
138	F18	mmu-miR-221-000524	25.0407
139	F19	mmu-miR-222-002276	21.7215
140	F20	mmu-miR-223-002295	22.0606
141	F21	mmu-miR-224-002553	31.8012
142	F22	mmu-miR-290-3p-002591	Undetermined
143	F23	mmu-miR-291a-3p-002592	Undetermined
144	F24	mmu-miR-291b-5p-002537	Undetermined
145	G1	mmu-miR-292-3p-002593	Undetermined
146	G2	mmu-miR-293-001794	Undetermined
147	G3	mmu-miR-294-001056	Undetermined
148	G4	mmu-miR-295-000189	36.7185
149	G5	mmu-miR-296-3p-002101	Undetermined
150	G6	mmu-miR-296-5p-000527	27.9132
151	G7	mmu-miR-297c-002480	Undetermined
152	G8	mmu-miR-297b-5p-001626	35.2574
153	G9	mmu-miR-298-002598	30.5542
154	G10	mmu-miR-301a-000528	26.6528
155	G11	mmu-miR-301b-002600	27.6585
156	G12	mmu-miR-302a-000529	Undetermined
157	G13	mmu-miR-302c-002558	Undetermined
158	G14	mmu-miR-302d-000535	Undetermined
159	G15	mmu-miR-320-002277	26.8025
160	G16	mmu-miR-323-3p-002227	26.4197
161	G17	mmu-miR-324-5p-000539	28.7995
162	G18	mmu-miR-325-002510	34.3395
163	G19	rno-miR-327-001328	33.8906
164	G20	mmu-miR-328-000543	23.2489
165	G21	mmu-miR-329-000192	31.4942
166	G22	mmu-miR-330-002230	32.2107
167	G23	mmu-miR-331-3p-000545	24.8253
168	G24	mmu-miR-331-5p-002233	34.8574
169	H1	rno-miR-333-001329	Undetermined
170	H2	mmu-miR-335-3p-002185	27.48
171	H3	mmu-miR-335-5p-000546	25.9814
172	H4	rno-miR-336-001331	Undetermined
173	H5	mmu-miR-337-3p-002532	29.2747
174	H6	mmu-miR-337-5p-002515	27.4805
175	H7	mmu-miR-338-3p-002252	30.019
176	H8	mmu-miR-339-3p-002533	29.291
177	H9	rno-miR-339-3p-002059	32.1273
178	H10	mmu-miR-339-5p-002257	29.2177
179	H11	U87-001712	Undetermined
180	H12	mmu-miR-340-3p-002259	28.2768
181	H13	mmu-miR-340-5p-002258	26.5882
182	H14	mmu-miR-342-3p-002260	23.215
183	H15	mmu-miR-342-5p-002527	30.3791
184	H16	rno-miR-343-001344	Undetermined
185	H17	mmu-miR-344-001063	27.4368
186	H18	rno-miR-344-3p-001332	34.015
187	H19	rno-miR-344-5p-002060	Undetermined
188	H20	mmu-miR-345-3p-002529	Undetermined
189	H21	rno-miR-345-3p-002061	32.2711
190	H22	mmu-miR-345-5p-002528	30.3254
191	H23	mmu-miR-346-001064	33.9884
192	H24	rno-miR-346-001333	32.6001
193	I1	rno-miR-347-001334	Undetermined
194	I2	rno-miR-349-001335	Undetermined
195	I3	mmu-miR-350-002530	29.9804
196	I4	rno-miR-351-002063	33.3246
197	I5	mmu-miR-361-000554	30.4773
198	I6	mmu-miR-362-3p-002616	31.9628
199	I7	mmu-miR-363-001271	Undetermined
200	I8	mmu-miR-365-001020	27.9035
201	I9	mmu-miR-367-000555	Undetermined
202	I10	mmu-miR-369-3p-000557	34.2667
203	I11	mmu-miR-369-5p-001021	29.0353
204	I12	mmu-miR-370-002275	27.2623
205	I13	mmu-miR-375-000564	23.4626
206	I14	mmu-miR-376a-001069	26.3572
207	I15	mmu-miR-376b-002452	28.1463
208	I16	mmu-miR-376c-002450	28.9688
209	I17	mmu-miR-377-000566	34.4698
210	I18	rno-miR-377-001320	Undetermined
211	I19	mmu-miR-379-001138	26.0463
212	I20	mmu-miR-380-3p-001071	33.9055
213	I21	mmu-miR-380-5p-002601	27.8775
214	I22	mmu-miR-381-000571	35.0091
215	I23	mmu-miR-382-000572	24.907
216	I24	mmu-miR-383-001767	27.4916
217	J1	mmu-miR-384-3p-002603	29.4415
218	J2	mmu-miR-384-5p-002602	24.33
219	J3	mmu-miR-409-3p-002332	26.0988
220	J4	mmu-miR-409-5p-002331	30.4098
221	J5	mmu-miR-410-001274	26.704
222	J6	mmu-miR-411-001610	24.9194
223	J7	rno-miR-421-001343	Undetermined
224	J8	mmu-miR-423-5p-002340	34.5593
225	J9	mmu-miR-425-001516	33.8445
226	J10	mmu-miR-429-001077	26.4408
227	J11	Y1-001727	Undetermined
228	J12	mmu-miR-431-001979	26.2635
229	J13	mmu-miR-433-001028	27.0074
230	J14	mmu-miR-434-3p-002604	22.7292
231	J15	mmu-miR-434-5p-002581	33.3415
232	J16	mmu-miR-448-001029	31.9724
233	J17	mmu-miR-449a-001030	31.7145
234	J18	mmu-miR-449b-002539	Undetermined
235	J19	mmu-miR-450a-5p-002303	33.8973
236	J20	mmu-miR-450b-5p-001962	Undetermined
237	J21	mmu-miR-451-001141	28.0148
238	J22	mmu-miR-453-002484	Undetermined
239	J23	mmu-miR-455-002455	34.4376
240	J24	mmu-miR-465a-3p-002040	Undetermined
241	K1	mmu-miR-465a-5p-001082	Undetermined
242	K2	mmu-miR-465b-5p-002485	Undetermined
243	K3	rno-miR-466b-002066	Undetermined
244	K4	rno-miR-466c-002067	Undetermined
245	K5	mmu-miR-466h-002516	Undetermined
246	K6	mmu-miR-467a-002587	30.0484
247	K7	mmu-miR-467c-002517	33.7688
248	K8	mmu-miR-467d-002518	33.3766
249	K9	mmu-miR-467e-002568	32.0755
250	K10	mmu-miR-470-002588	Undetermined
251	K11	mmu-miR-484-001821	23.041
252	K12	mmu-miR-486-001278	26.7566
253	K13	mmu-miR-487b-001285	26.9448
254	K14	mmu-miR-489-001302	Undetermined
255	K15	mmu-miR-491-001630	27.5475
256	K16	mmu-miR-493-002519	Undetermined
257	K17	mmu-miR-494-002365	28.9044
258	K18	mmu-miR-495-001663	25.672
259	K19	mmu-miR-497-001346	28.1292
260	K20	mmu-miR-499-001352	Undetermined
261	K21	mmu-miR-500-002606	31.9859
262	K22	mmu-miR-501-3p-001651	32.6782
263	K23	mmu-miR-503-002456	32.9542
264	K24	mmu-miR-504-002084	32.2128
265	L1	mmu-miR-505-001655	Undetermined
266	L2	mmu-miR-509-3p-002521	36.2766
267	L3	mmu-miR-509-5p-002520	Undetermined
268	L4	mmu-miR-511-002549	35.2846
269	L5	mmu-miR-532-3p-002355	28.1117
270	L6	mmu-miR-532-5p-001518	26.1539
271	L7	rno-miR-532-5p-002051	27.2254
272	L8	mmu-miR-539-001286	26.6793
273	L9	mmu-miR-540-3p-001310	30.5057
274	L10	mmu-miR-540-5p-002561	33.4538
275	L11	ath-miR159a-000338	Undetermined
276	L12	mmu-miR-542-3p-001284	Undetermined
277	L13	mmu-miR-542-5p-002563	34.3188
278	L14	mmu-miR-543-002376	28.2558
279	L15	rno-miR-543-002065	Undetermined
280	L16	mmu-miR-544-002550	28.7229
281	L17	mmu-miR-551b-001535	32.4675
282	L18	mmu-miR-574-3p-002349	26.2629
283	L19	mmu-miR-582-3p-002567	34.114
284	L20	mmu-miR-582-5p-002566	32.9898
285	L21	mmu-miR-590-5p-001984	Undetermined
286	L22	mmu-miR-598-002476	28.0223
287	L23	rno-miR-598-5p-002053	33.1139
288	L24	mmu-miR-615-3p-001960	Undetermined
289	M1	mmu-miR-615-5p-002353	Undetermined
290	M2	mmu-miR-654-3p-002239	Undetermined
291	M3	mmu-miR-654-5p-002522	Undetermined
292	M4	mmu-miR-665-002607	33.6357
293	M5	mmu-miR-666-5p-001952	32.7089
294	M6	mmu-miR-669a-001683	32.3765
295	M7	mmu-miR-671-3p-002322	29.7811
296	M8	mmu-miR-672-002327	27.4101
297	M9	rno-miR-673-002054	Undetermined
298	M10	mmu-miR-674-002021	28.9321
299	M11	mmu-miR-708-002341	26.3329
300	M12	mmu-miR-741-002457	32.5356
301	M13	mmu-miR-742-002038	Undetermined
302	M14	rno-miR-742-002055	Undetermined
303	M15	mmu-miR-743b-3p-002471	Undetermined
304	M16	mmu-miR-743b-5p-002470	Undetermined
305	M17	mmu-miR-743a-002469	32.3649
306	M18	rno-miR-743b-002068	35.006
307	M19	mmu-miR-744-002324	26.9851
308	M20	rno-miR-758-001990	30.2984
309	M21	rno-miR-760-5p-002057	Undetermined
310	M22	mmu-miR-770-3p-002027	33.1826
311	M23	mmu-miR-802-002029	35.4429
312	M24	mmu-miR-871-002354	Undetermined
313	N1	rno-miR-871-002069	Undetermined
314	N2	mmu-miR-872-002264	28.253
315	N3	mmu-miR-873-002356	33.3604
316	N4	mmu-miR-874-002268	33.2947
317	N5	mmu-miR-875-3p-002547	Undetermined
318	N6	mmu-miR-876-3p-002464	Undetermined
319	N7	mmu-miR-876-5p-002463	Undetermined
320	N8	rno-miR-878-002070	Undetermined
321	N9	mmu-miR-878-5p-002540	Undetermined
322	N10	mmu-miR-879-002472	34.0925
323	N11	mmu-miR-881-002609	Undetermined
324	N12	rno-miR-881-002072	Undetermined
325	N13	mmu-miR-883a-3p-002461	Undetermined
326	N14	mmu-miR-883b-3p-002565	Undetermined
327	N15	mmu-miR-883a-5p-002611	Undetermined
328	N16	mmu-miR-125b-3p-002378	Undetermined
329	N17	mmu-miR-143-002249	26.9178
330	N18	rno-miR-219-1-3p-002077	35.3314
331	N19	rno-miR-219-2-3p-002390	29.4201
332	N20	rno-miR-224-000599	35.1104
333	N21	mmu-miR-324-3p-002509	27.9191
334	N22	mmu-miR-351-001067	30.926
335	N23	rno-miR-381-001322	28.8574
336	N24	rno-miR-409-5p-001317	30.4643
337	O1	rno-miR-450a-001345	35.5674
338	O2	mmu-miR-452-001032	Undetermined
339	O3	mmu-miR-464-001081	Undetermined
340	O4	mmu-miR-467b-001671	30.5567
341	O5	mmu-miR-468-001085	35.485
342	O6	mmu-miR-469-001086	Undetermined
343	O7	mmu-miR-488-001659	30.9093
344	O8	mmu-miR-490-001037	30.9444
345	O9	mmu-miR-496-001953	31.4502
346	O10	rno-miR-505-001316	Undetermined
347	O11	mmu-miR-546-001312	32.3984
348	O12	mmu-miR-547-002564	32.5305
349	O13	mmu-miR-652-002352	26.0032
350	O14	mmu-miR-667-001949	34.4083
351	O15	mmu-miR-668-001947	33.6541
352	O16	mmu-miR-670-002020	Undetermined
353	O17	mmu-miR-675-3p-001941	34.8681
354	O18	mmu-miR-675-5p-001940	Undetermined
355	O19	mmu-miR-676-001959	27.2733
356	O20	mmu-miR-677-001660	Undetermined
357	O21	mmu-miR-679-001662	Undetermined
358	O22	mmu-miR-680-001664	32.9289
359	O23	mmu-miR-682-001666	32.7602
360	O24	mmu-miR-683-001668	Undetermined
361	P1	mmu-miR-684-001669	Undetermined
362	P2	mmu-miR-685-001670	31.3789
363	P3	mmu-miR-686-001672	Undetermined
364	P4	mmu-miR-687-001674	33.4073
365	P5	mmu-let-7a-000377	26.4671
366	P6	mmu-let-7f-000382	27.7867
367	P7	mmu-miR-106b-000442	27.2905
368	P8	mmu-miR-155-002571	28.225
369	P9	mmu-miR-17-002308	24.782
370	P10	mmu-miR-23a-000399	32.8361
371	P11	mmu-miR-29a-002112	20.2885
372	P12	mmu-miR-30a-000417	24.3531
373	P13	mmu-miR-30e-002223	24.1969
374	P14	mmu-miR-31-000185	26.297
375	P15	mmu-miR-34b-3p-002618	27.3956
376	P16	mmu-miR-92a-000430	28.0144
377	P17	rno-miR-190b-002048	32.3307
378	P18	mmu-miR-129-5p-000590	29.25
379	P19	mmu-miR-187-001193	28.9739
380	P20	mmu-miR-188-3p-002106	Undetermined
381	P21	mmu-miR-106a-002459	26.5073
382	P22	mmu-miR-188-5p-002320	31.5828
383	P23	mmu-miR-302b-000531	Undetermined
384	P24	mmu-miR-322-001076	29.6224

## Sheet: HIS contra
Well	Well Position	Target Name	CT
1	A1
2	A2	mmu-let-7c-000379	24.3164
3	A3	mmu-let-7d-002283	25.2982
4	A4	mmu-let-7e-002406	23.8533
5	A5	mmu-let-7g-002282	24.2515
6	A6	mmu-let-7i-002221	24.0948
7	A7	mmu-miR-1-002222	33.1128
8	A8	rno-miR-1-002064	30.9682
9	A9	mmu-miR-7a-000268	29.8924
10	A10	mmu-miR-7b-002555	30.1735
11	A11	U6 snRNA-001973	18.2168
12	A12	U6 snRNA-001973	18.2944
13	A13	mmu-miR-9-000583	19.3745
14	A14	mmu-miR-10a-000387	33.2378
15	A15	mmu-miR-10b-002218	35.1706
16	A16	mmu-miR-15a-000389	27.5217
17	A17	mmu-miR-15b-000390	28.4484
18	A18	mmu-miR-16-000391	22.1042
19	A19	rno-miR-17-3p-002078	32.6969
20	A20	mmu-miR-18a-002422	32.4475
21	A21	mmu-miR-18b-002466	Undetermined
22	A22	mmu-miR-19a-000395	27.3714
23	A23	mmu-miR-19b-000396	23.2991
24	A24	mmu-miR-20a-000580	26.2345
25	B1	mmu-miR-20b-001014	31.9619
26	B2	rno-miR-20b-3p-002052	Undetermined
27	B3	mmu-miR-21-000397	24.4685
28	B4	mmu-miR-23b-000400	28.4766
29	B5	mmu-miR-24-000402	20.8991
30	B6	mmu-miR-25-000403	30.1251
31	B7	mmu-miR-26a-000405	21.5653
32	B8	mmu-miR-26b-000407	24.7304
33	B9	mmu-miR-27a-000408	27.4433
34	B10	mmu-miR-27b-000409	27.454
35	B11	U6 snRNA-001973	16.5466
36	B12	U6 snRNA-001973	15.2211
37	B13	mmu-miR-28-000411	30.5117
38	B14	mmu-miR-29b-000413	26.395
39	B15	mmu-miR-29c-000587	28.2065
40	B16	mmu-miR-30b-000602	22.4983
41	B17	mmu-miR-30c-000419	21.3036
42	B18	mmu-miR-30d-000420	24.9138
43	B19	mmu-miR-32-002109	33.8168
44	B20	mmu-miR-34a-000426	26.3964
45	B21	mmu-miR-34c-000428	28.4265
46	B22	mmu-miR-93-001090	26.2082
47	B23	mmu-miR-96-000186	Undetermined
48	B24	mmu-miR-98-000577	30.5406
49	C1	mmu-miR-99a-000435	24.1656
50	C2	mmu-miR-99b-000436	25.1814
51	C3	mmu-miR-100-000437	24.4031
52	C4	mmu-miR-101a-002253	28.6773
53	C5	mmu-miR-103-000439	26.0781
54	C6	mmu-miR-105-002465	Undetermined
55	C7	mmu-miR-107-000443	30.2592
56	C8	mmu-miR-122-002245	Undetermined
57	C9	mmu-miR-124-001182	23.6573
58	C10	mmu-miR-125a-3p-002199	33.2833
59	C11	mmu-miR-125a-5p-002198	24.3085
60	C12	mmu-miR-125b-5p-000449	21.5768
61	C13	mmu-miR-126-3p-002228	21.4118
62	C14	mmu-miR-126-5p-000451	25.4941
63	C15	mmu-miR-127-000452	23.5103
64	C16	mmu-miR-128a-002216	23.484
65	C17	mmu-miR-129-3p-001184	23.7712
66	C18	mmu-miR-130a-000454	29.2821
67	C19	mmu-miR-130b-000456	30.186
68	C20	mmu-miR-132-000457	19.8049
69	C21	mmu-miR-133a-002246	27.6257
70	C22	mmu-miR-133b-002247	29.9285
71	C23	mmu-miR-134-001186	28.1048
72	C24	mmu-miR-135a-000460	26.3611
73	D1	mmu-miR-135b-002261	25.8861
74	D2	mmu-miR-136-002511	25.1951
75	D3	mmu-miR-137-001129	25.8643
76	D4	mmu-miR-138-002284	21.6598
77	D5	mmu-miR-139-3p-002546	28.2692
78	D6	mmu-miR-139-5p-002289	22.2582
79	D7	mmu-miR-140-001187	25.0569
80	D8	mmu-miR-141-000463	Undetermined
81	D9	mmu-miR-142-3p-000464	26.0195
82	D10	mmu-miR-142-5p-002248	32.1546
83	D11	snoRNA135-001230	26.8578
84	D12	mmu-miR-145-002278	23.8426
85	D13	mmu-miR-146a-000468	23.5337
86	D14	mmu-miR-146b-001097	25.269
87	D15	mmu-miR-147-002262	34.9314
88	D16	mmu-miR-148a-000470	29.1693
89	D17	mmu-miR-148b-000471	30.2667
90	D18	mmu-miR-150-000473	24.4458
91	D19	mmu-miR-151-3p-001190	28.3917
92	D20	mmu-miR-152-000475	28.9239
93	D21	mmu-miR-153-001191	30.5982
94	D22	mmu-miR-154-000477	32.0008
95	D23	mmu-miR-181a-000480	25.1665
96	D24	mmu-miR-181c-000482	32.6821
97	E1	mmu-miR-182-002599	31.7322
98	E2	mmu-miR-183-002269	34.5087
99	E3	mmu-miR-184-000485	31.0937
100	E4	mmu-miR-185-002271	28.548
101	E5	mmu-miR-186-002285	26.3609
102	E6	mmu-miR-190-000489	30.7126
103	E7	mmu-miR-191-002299	22.0293
104	E8	mmu-miR-192-000491	29.2833
105	E9	mmu-miR-193-002250	34.4627
106	E10	mmu-miR-193b-002467	25.4852
107	E11	mmu-miR-194-000493	29.4609
108	E12	mmu-miR-195-000494	24.8182
109	E13	mmu-miR-196b-002215	Undetermined
110	E14	rno-miR-196c-002049	33.4126
111	E15	mmu-miR-197-000497	33.8888
112	E16	mmu-miR-199a-3p-002304	30.3022
113	E17	mmu-miR-199a-5p-000498	Undetermined
114	E18	mmu-miR-200a-000502	30.0095
115	E19	mmu-miR-200b-002251	30.0523
116	E20	mmu-miR-200c-002300	31.6454
117	E21	mmu-miR-201-002578	Undetermined
118	E22	mmu-miR-202-3p-001195	32.886
119	E23	mmu-miR-202-5p-002579	35.0592
120	E24	mmu-miR-203-000507	27.7057
121	F1	mmu-miR-204-000508	22.8393
122	F2	mmu-miR-205-000509	Undetermined
123	F3	mmu-miR-207-001198	Undetermined
124	F4	rno-miR-207-001315	33.6
125	F5	mmu-miR-208-000511	Undetermined
126	F6	mmu-miR-208b-002290	Undetermined
127	F7	mmu-miR-210-000512	27.6649
128	F8	mmu-miR-211-001199	33.7701
129	F9	mmu-miR-214-002306	32.4341
130	F10	mmu-miR-215-001200	33.0689
131	F11	snoRNA202-001232	22.2451
132	F12	mmu-miR-216a-002220	34.8425
133	F13	mmu-miR-216b-002326	34.072
134	F14	mmu-miR-217-002556	34.2275
135	F15	mmu-miR-218-000521	21.9512
136	F16	mmu-miR-219-000522	27.8264
137	F17	mmu-miR-220-002468	Undetermined
138	F18	mmu-miR-221-000524	25.0059
139	F19	mmu-miR-222-002276	21.4551
140	F20	mmu-miR-223-002295	25.7199
141	F21	mmu-miR-224-002553	34.841
142	F22	mmu-miR-290-3p-002591	Undetermined
143	F23	mmu-miR-291a-3p-002592	Undetermined
144	F24	mmu-miR-291b-5p-002537	Undetermined
145	G1	mmu-miR-292-3p-002593	35.1496
146	G2	mmu-miR-293-001794	Undetermined
147	G3	mmu-miR-294-001056	Undetermined
148	G4	mmu-miR-295-000189	Undetermined
149	G5	mmu-miR-296-3p-002101	Undetermined
150	G6	mmu-miR-296-5p-000527	27.5991
151	G7	mmu-miR-297c-002480	32.9711
152	G8	mmu-miR-297b-5p-001626	Undetermined
153	G9	mmu-miR-298-002598	31.296
154	G10	mmu-miR-301a-000528	26.648
155	G11	mmu-miR-301b-002600	27.6561
156	G12	mmu-miR-302a-000529	Undetermined
157	G13	mmu-miR-302c-002558	Undetermined
158	G14	mmu-miR-302d-000535	Undetermined
159	G15	mmu-miR-320-002277	26.9681
160	G16	mmu-miR-323-3p-002227	26.2833
161	G17	mmu-miR-324-5p-000539	28.627
162	G18	mmu-miR-325-002510	32.579
163	G19	rno-miR-327-001328	34.2853
164	G20	mmu-miR-328-000543	23.4038
165	G21	mmu-miR-329-000192	32.0251
166	G22	mmu-miR-330-002230	31.0414
167	G23	mmu-miR-331-3p-000545	24.526
168	G24	mmu-miR-331-5p-002233	34.4968
169	H1	rno-miR-333-001329	Undetermined
170	H2	mmu-miR-335-3p-002185	28.1597
171	H3	mmu-miR-335-5p-000546	26.9545
172	H4	rno-miR-336-001331	Undetermined
173	H5	mmu-miR-337-3p-002532	29.5738
174	H6	mmu-miR-337-5p-002515	27.6544
175	H7	mmu-miR-338-3p-002252	29.4151
176	H8	mmu-miR-339-3p-002533	29.512
177	H9	rno-miR-339-3p-002059	33.1141
178	H10	mmu-miR-339-5p-002257	30.2691
179	H11	U87-001712	Undetermined
180	H12	mmu-miR-340-3p-002259	28.3244
181	H13	mmu-miR-340-5p-002258	26.9251
182	H14	mmu-miR-342-3p-002260	22.835
183	H15	mmu-miR-342-5p-002527	30.1758
184	H16	rno-miR-343-001344	Undetermined
185	H17	mmu-miR-344-001063	27.3685
186	H18	rno-miR-344-3p-001332	34.7601
187	H19	rno-miR-344-5p-002060	34.8471
188	H20	mmu-miR-345-3p-002529	Undetermined
189	H21	rno-miR-345-3p-002061	32.0353
190	H22	mmu-miR-345-5p-002528	30.7097
191	H23	mmu-miR-346-001064	33.7271
192	H24	rno-miR-346-001333	32.6522
193	I1	rno-miR-347-001334	Undetermined
194	I2	rno-miR-349-001335	Undetermined
195	I3	mmu-miR-350-002530	30.7845
196	I4	rno-miR-351-002063	32.5217
197	I5	mmu-miR-361-000554	30.1829
198	I6	mmu-miR-362-3p-002616	32.0776
199	I7	mmu-miR-363-001271	Undetermined
200	I8	mmu-miR-365-001020	27.9139
201	I9	mmu-miR-367-000555	Undetermined
202	I10	mmu-miR-369-3p-000557	33.9436
203	I11	mmu-miR-369-5p-001021	29.6241
204	I12	mmu-miR-370-002275	27.4413
205	I13	mmu-miR-375-000564	31.438
206	I14	mmu-miR-376a-001069	26.3567
207	I15	mmu-miR-376b-002452	28.1824
208	I16	mmu-miR-376c-002450	29.2286
209	I17	mmu-miR-377-000566	Undetermined
210	I18	rno-miR-377-001320	Undetermined
211	I19	mmu-miR-379-001138	26.3314
212	I20	mmu-miR-380-3p-001071	34.9489
213	I21	mmu-miR-380-5p-002601	28.108
214	I22	mmu-miR-381-000571	33.1374
215	I23	mmu-miR-382-000572	25.082
216	I24	mmu-miR-383-001767	27.0795
217	J1	mmu-miR-384-3p-002603	28.9715
218	J2	mmu-miR-384-5p-002602	24.0371
219	J3	mmu-miR-409-3p-002332	26.1712
220	J4	mmu-miR-409-5p-002331	30.1149
221	J5	mmu-miR-410-001274	26.6927
222	J6	mmu-miR-411-001610	24.9635
223	J7	rno-miR-421-001343	Undetermined
224	J8	mmu-miR-423-5p-002340	34.5648
225	J9	mmu-miR-425-001516	32.8487
226	J10	mmu-miR-429-001077	30.3911
227	J11	Y1-001727	Undetermined
228	J12	mmu-miR-431-001979	26.811
229	J13	mmu-miR-433-001028	26.958
230	J14	mmu-miR-434-3p-002604	22.4019
231	J15	mmu-miR-434-5p-002581	34.873
232	J16	mmu-miR-448-001029	30.2557
233	J17	mmu-miR-449a-001030	32.4562
234	J18	mmu-miR-449b-002539	34.4701
235	J19	mmu-miR-450a-5p-002303	35.2943
236	J20	mmu-miR-450b-5p-001962	Undetermined
237	J21	mmu-miR-451-001141	29.9528
238	J22	mmu-miR-453-002484	Undetermined
239	J23	mmu-miR-455-002455	32.6046
240	J24	mmu-miR-465a-3p-002040	Undetermined
241	K1	mmu-miR-465a-5p-001082	Undetermined
242	K2	mmu-miR-465b-5p-002485	Undetermined
243	K3	rno-miR-466b-002066	Undetermined
244	K4	rno-miR-466c-002067	Undetermined
245	K5	mmu-miR-466h-002516	Undetermined
246	K6	mmu-miR-467a-002587	30.1126
247	K7	mmu-miR-467c-002517	33.2727
248	K8	mmu-miR-467d-002518	35.0295
249	K9	mmu-miR-467e-002568	33.1045
250	K10	mmu-miR-470-002588	Undetermined
251	K11	mmu-miR-484-001821	22.7668
252	K12	mmu-miR-486-001278	27.9488
253	K13	mmu-miR-487b-001285	26.9905
254	K14	mmu-miR-489-001302	32.3275
255	K15	mmu-miR-491-001630	27.3188
256	K16	mmu-miR-493-002519	Undetermined
257	K17	mmu-miR-494-002365	29.3395
258	K18	mmu-miR-495-001663	25.8221
259	K19	mmu-miR-497-001346	28.4331
260	K20	mmu-miR-499-001352	33.2702
261	K21	mmu-miR-500-002606	31.2998
262	K22	mmu-miR-501-3p-001651	33.5923
263	K23	mmu-miR-503-002456	32.497
264	K24	mmu-miR-504-002084	33.5143
265	L1	mmu-miR-505-001655	Undetermined
266	L2	mmu-miR-509-3p-002521	35.0079
267	L3	mmu-miR-509-5p-002520	Undetermined
268	L4	mmu-miR-511-002549	Undetermined
269	L5	mmu-miR-532-3p-002355	27.8831
270	L6	mmu-miR-532-5p-001518	25.9178
271	L7	rno-miR-532-5p-002051	26.9164
272	L8	mmu-miR-539-001286	26.5144
273	L9	mmu-miR-540-3p-001310	30.845
274	L10	mmu-miR-540-5p-002561	32.4231
275	L11	ath-miR159a-000338	Undetermined
276	L12	mmu-miR-542-3p-001284	Undetermined
277	L13	mmu-miR-542-5p-002563	33.3693
278	L14	mmu-miR-543-002376	28.25
279	L15	rno-miR-543-002065	Undetermined
280	L16	mmu-miR-544-002550	28.9143
281	L17	mmu-miR-551b-001535	33.1822
282	L18	mmu-miR-574-3p-002349	26.955
283	L19	mmu-miR-582-3p-002567	34.5313
284	L20	mmu-miR-582-5p-002566	32.3368
285	L21	mmu-miR-590-5p-001984	Undetermined
286	L22	mmu-miR-598-002476	28.4963
287	L23	rno-miR-598-5p-002053	32.9252
288	L24	mmu-miR-615-3p-001960	Undetermined
289	M1	mmu-miR-615-5p-002353	Undetermined
290	M2	mmu-miR-654-3p-002239	Undetermined
291	M3	mmu-miR-654-5p-002522	Undetermined
292	M4	mmu-miR-665-002607	33.0481
293	M5	mmu-miR-666-5p-001952	32.0374
294	M6	mmu-miR-669a-001683	32.2963
295	M7	mmu-miR-671-3p-002322	29.9627
296	M8	mmu-miR-672-002327	28.6917
297	M9	rno-miR-673-002054	Undetermined
298	M10	mmu-miR-674-002021	29.3125
299	M11	mmu-miR-708-002341	26.4393
300	M12	mmu-miR-741-002457	33.6811
301	M13	mmu-miR-742-002038	Undetermined
302	M14	rno-miR-742-002055	Undetermined
303	M15	mmu-miR-743b-3p-002471	Undetermined
304	M16	mmu-miR-743b-5p-002470	Undetermined
305	M17	mmu-miR-743a-002469	33.262
306	M18	rno-miR-743b-002068	Undetermined
307	M19	mmu-miR-744-002324	26.9633
308	M20	rno-miR-758-001990	30.4672
309	M21	rno-miR-760-5p-002057	Undetermined
310	M22	mmu-miR-770-3p-002027	35.0159
311	M23	mmu-miR-802-002029	36.3464
312	M24	mmu-miR-871-002354	Undetermined
313	N1	rno-miR-871-002069	Undetermined
314	N2	mmu-miR-872-002264	28.1799
315	N3	mmu-miR-873-002356	32.1951
316	N4	mmu-miR-874-002268	33.0054
317	N5	mmu-miR-875-3p-002547	Undetermined
318	N6	mmu-miR-876-3p-002464	Undetermined
319	N7	mmu-miR-876-5p-002463	35.3289
320	N8	rno-miR-878-002070	Undetermined
321	N9	mmu-miR-878-5p-002540	Undetermined
322	N10	mmu-miR-879-002472	35.3649
323	N11	mmu-miR-881-002609	Undetermined
324	N12	rno-miR-881-002072	Undetermined
325	N13	mmu-miR-883a-3p-002461	Undetermined
326	N14	mmu-miR-883b-3p-002565	Undetermined
327	N15	mmu-miR-883a-5p-002611	Undetermined
328	N16	mmu-miR-125b-3p-002378	Undetermined
329	N17	mmu-miR-143-002249	26.8962
330	N18	rno-miR-219-1-3p-002077	Undetermined
331	N19	rno-miR-219-2-3p-002390	29.3722
332	N20	rno-miR-224-000599	35.3237
333	N21	mmu-miR-324-3p-002509	27.9405
334	N22	mmu-miR-351-001067	31.0222
335	N23	rno-miR-381-001322	29.3544
336	N24	rno-miR-409-5p-001317	31.4536
337	O1	rno-miR-450a-001345	Undetermined
338	O2	mmu-miR-452-001032	Undetermined
339	O3	mmu-miR-464-001081	Undetermined
340	O4	mmu-miR-467b-001671	30.9292
341	O5	mmu-miR-468-001085	33.1294
342	O6	mmu-miR-469-001086	Undetermined
343	O7	mmu-miR-488-001659	31.0349
344	O8	mmu-miR-490-001037	31.4908
345	O9	mmu-miR-496-001953	31.7213
346	O10	rno-miR-505-001316	Undetermined
347	O11	mmu-miR-546-001312	Undetermined
348	O12	mmu-miR-547-002564	34.5476
349	O13	mmu-miR-652-002352	25.7997
350	O14	mmu-miR-667-001949	36.432
351	O15	mmu-miR-668-001947	32.8366
352	O16	mmu-miR-670-002020	Undetermined
353	O17	mmu-miR-675-3p-001941	Undetermined
354	O18	mmu-miR-675-5p-001940	Undetermined
355	O19	mmu-miR-676-001959	27.6313
356	O20	mmu-miR-677-001660	Undetermined
357	O21	mmu-miR-679-001662	Undetermined
358	O22	mmu-miR-680-001664	34.6723
359	O23	mmu-miR-682-001666	Undetermined
360	O24	mmu-miR-683-001668	36.467
361	P1	mmu-miR-684-001669	Undetermined
362	P2	mmu-miR-685-001670	31.383
363	P3	mmu-miR-686-001672	Undetermined
364	P4	mmu-miR-687-001674	36.686
365	P5	mmu-let-7a-000377	26.7261
366	P6	mmu-let-7f-000382	27.8827
367	P7	mmu-miR-106b-000442	27.9223
368	P8	mmu-miR-155-002571	29.5243
369	P9	mmu-miR-17-002308	25.0969
370	P10	mmu-miR-23a-000399	35.4982
371	P11	mmu-miR-29a-002112	20.3294
372	P12	mmu-miR-30a-000417	24.2823
373	P13	mmu-miR-30e-002223	24.1839
374	P14	mmu-miR-31-000185	26.4032
375	P15	mmu-miR-34b-3p-002618	25.9779
376	P16	mmu-miR-92a-000430	29.0708
377	P17	rno-miR-190b-002048	33.9483
378	P18	mmu-miR-129-5p-000590	29.3624
379	P19	mmu-miR-187-001193	27.9917
380	P20	mmu-miR-188-3p-002106	Undetermined
381	P21	mmu-miR-106a-002459	26.4761
382	P22	mmu-miR-188-5p-002320	31.7231
383	P23	mmu-miR-302b-000531	Undetermined
384	P24	mmu-miR-322-001076	29.8888

## Sheet: LIS ipsi
Well	Well Position	Target Name	CT
1	A1
2	A2	mmu-let-7c-000379	23.5884
3	A3	mmu-let-7d-002283	25.9531
4	A4	mmu-let-7e-002406	23.8546
5	A5	mmu-let-7g-002282	24.2666
6	A6	mmu-let-7i-002221	24.2204
7	A7	mmu-miR-1-002222	31.2306
8	A8	rno-miR-1-002064	31.3637
9	A9	mmu-miR-7a-000268	30.9454
10	A10	mmu-miR-7b-002555	30.4179
11	A11	U6 snRNA-001973	18.9148
12	A12	U6 snRNA-001973	17.6441
13	A13	mmu-miR-9-000583	19.3661
14	A14	mmu-miR-10a-000387	32.9202
15	A15	mmu-miR-10b-002218	38.1783
16	A16	mmu-miR-15a-000389	28.0675
17	A17	mmu-miR-15b-000390	27.5456
18	A18	mmu-miR-16-000391	22.2463
19	A19	rno-miR-17-3p-002078	33.3839
20	A20	mmu-miR-18a-002422	31.011
21	A21	mmu-miR-18b-002466	Undetermined
22	A22	mmu-miR-19a-000395	27.1236
23	A23	mmu-miR-19b-000396	23.321
24	A24	mmu-miR-20a-000580	26.4311
25	B1	mmu-miR-20b-001014	31.9465
26	B2	rno-miR-20b-3p-002052	Undetermined
27	B3	mmu-miR-21-000397	23.5595
28	B4	mmu-miR-23b-000400	28.9296
29	B5	mmu-miR-24-000402	21.4371
30	B6	mmu-miR-25-000403	30.1263
31	B7	mmu-miR-26a-000405	22.1655
32	B8	mmu-miR-26b-000407	25.0348
33	B9	mmu-miR-27a-000408	27.6349
34	B10	mmu-miR-27b-000409	27.3788
35	B11	U6 snRNA-001973	18.8072
36	B12	U6 snRNA-001973	18.4596
37	B13	mmu-miR-28-000411	30.5952
38	B14	mmu-miR-29b-000413	27.3825
39	B15	mmu-miR-29c-000587	28.9145
40	B16	mmu-miR-30b-000602	22.7791
41	B17	mmu-miR-30c-000419	21.7294
42	B18	mmu-miR-30d-000420	25.3095
43	B19	mmu-miR-32-002109	37.3186
44	B20	mmu-miR-34a-000426	26.7837
45	B21	mmu-miR-34c-000428	29.3261
46	B22	mmu-miR-93-001090	26.9444
47	B23	mmu-miR-96-000186	Undetermined
48	B24	mmu-miR-98-000577	30.331
49	C1	mmu-miR-99a-000435	24.4945
50	C2	mmu-miR-99b-000436	24.844
51	C3	mmu-miR-100-000437	24.2697
52	C4	mmu-miR-101a-002253	29.2071
53	C5	mmu-miR-103-000439	26.7933
54	C6	mmu-miR-105-002465	Undetermined
55	C7	mmu-miR-107-000443	30.5158
56	C8	mmu-miR-122-002245	Undetermined
57	C9	mmu-miR-124-001182	24.2855
58	C10	mmu-miR-125a-3p-002199	33.2612
59	C11	mmu-miR-125a-5p-002198	25.6351
60	C12	mmu-miR-125b-5p-000449	22.1619
61	C13	mmu-miR-126-3p-002228	22.1169
62	C14	mmu-miR-126-5p-000451	25.9958
63	C15	mmu-miR-127-000452	23.831
64	C16	mmu-miR-128a-002216	24.0217
65	C17	mmu-miR-129-3p-001184	24.1485
66	C18	mmu-miR-130a-000454	29.3358
67	C19	mmu-miR-130b-000456	30.3109
68	C20	mmu-miR-132-000457	20.4127
69	C21	mmu-miR-133a-002246	28.1232
70	C22	mmu-miR-133b-002247	33.3565
71	C23	mmu-miR-134-001186	28.912
72	C24	mmu-miR-135a-000460	27.8839
73	D1	mmu-miR-135b-002261	26.4676
74	D2	mmu-miR-136-002511	25.2169
75	D3	mmu-miR-137-001129	26.2634
76	D4	mmu-miR-138-002284	22.3863
77	D5	mmu-miR-139-3p-002546	28.7436
78	D6	mmu-miR-139-5p-002289	23.2632
79	D7	mmu-miR-140-001187	25.4446
80	D8	mmu-miR-141-000463	33.9591
81	D9	mmu-miR-142-3p-000464	25.2475
82	D10	mmu-miR-142-5p-002248	31.1213
83	D11	snoRNA135-001230	27.467
84	D12	mmu-miR-145-002278	24.4683
85	D13	mmu-miR-146a-000468	24.2539
86	D14	mmu-miR-146b-001097	25.9446
87	D15	mmu-miR-147-002262	32.8094
88	D16	mmu-miR-148a-000470	30.3737
89	D17	mmu-miR-148b-000471	30.4368
90	D18	mmu-miR-150-000473	24.6283
91	D19	mmu-miR-151-3p-001190	28.6152
92	D20	mmu-miR-152-000475	29.436
93	D21	mmu-miR-153-001191	30.577
94	D22	mmu-miR-154-000477	31.502
95	D23	mmu-miR-181a-000480	24.9473
96	D24	mmu-miR-181c-000482	32.4821
97	E1	mmu-miR-182-002599	31.9164
98	E2	mmu-miR-183-002269	Undetermined
99	E3	mmu-miR-184-000485	31.4718
100	E4	mmu-miR-185-002271	29.4544
101	E5	mmu-miR-186-002285	27.3565
102	E6	mmu-miR-190-000489	31.5338
103	E7	mmu-miR-191-002299	22.8459
104	E8	mmu-miR-192-000491	30.1322
105	E9	mmu-miR-193-002250	34.1083
106	E10	mmu-miR-193b-002467	25.9884
107	E11	mmu-miR-194-000493	29.9031
108	E12	mmu-miR-195-000494	25.3239
109	E13	mmu-miR-196b-002215	37.3359
110	E14	rno-miR-196c-002049	Undetermined
111	E15	mmu-miR-197-000497	35.8694
112	E16	mmu-miR-199a-3p-002304	29.8026
113	E17	mmu-miR-199a-5p-000498	Undetermined
114	E18	mmu-miR-200a-000502	30.6759
115	E19	mmu-miR-200b-002251	31.058
116	E20	mmu-miR-200c-002300	31.9167
117	E21	mmu-miR-201-002578	Undetermined
118	E22	mmu-miR-202-3p-001195	32.4274
119	E23	mmu-miR-202-5p-002579	Undetermined
120	E24	mmu-miR-203-000507	28.3112
121	F1	mmu-miR-204-000508	23.19
122	F2	mmu-miR-205-000509	Undetermined
123	F3	mmu-miR-207-001198	Undetermined
124	F4	rno-miR-207-001315	Undetermined
125	F5	mmu-miR-208-000511	Undetermined
126	F6	mmu-miR-208b-002290	Undetermined
127	F7	mmu-miR-210-000512	27.2934
128	F8	mmu-miR-211-001199	Undetermined
129	F9	mmu-miR-214-002306	32.3454
130	F10	mmu-miR-215-001200	34.4855
131	F11	snoRNA202-001232	23.0483
132	F12	mmu-miR-216a-002220	Undetermined
133	F13	mmu-miR-216b-002326	34.2837
134	F14	mmu-miR-217-002556	Undetermined
135	F15	mmu-miR-218-000521	22.3465
136	F16	mmu-miR-219-000522	28.1439
137	F17	mmu-miR-220-002468	Undetermined
138	F18	mmu-miR-221-000524	25.2805
139	F19	mmu-miR-222-002276	22.36
140	F20	mmu-miR-223-002295	24.6617
141	F21	mmu-miR-224-002553	32.315
142	F22	mmu-miR-290-3p-002591	Undetermined
143	F23	mmu-miR-291a-3p-002592	Undetermined
144	F24	mmu-miR-291b-5p-002537	Undetermined
145	G1	mmu-miR-292-3p-002593	Undetermined
146	G2	mmu-miR-293-001794	Undetermined
147	G3	mmu-miR-294-001056	Undetermined
148	G4	mmu-miR-295-000189	Undetermined
149	G5	mmu-miR-296-3p-002101	39.0576
150	G6	mmu-miR-296-5p-000527	28.5701
151	G7	mmu-miR-297c-002480	Undetermined
152	G8	mmu-miR-297b-5p-001626	37.8882
153	G9	mmu-miR-298-002598	31.5327
154	G10	mmu-miR-301a-000528	27.4947
155	G11	mmu-miR-301b-002600	28.0932
156	G12	mmu-miR-302a-000529	Undetermined
157	G13	mmu-miR-302c-002558	Undetermined
158	G14	mmu-miR-302d-000535	Undetermined
159	G15	mmu-miR-320-002277	26.8704
160	G16	mmu-miR-323-3p-002227	26.9736
161	G17	mmu-miR-324-5p-000539	29.5498
162	G18	mmu-miR-325-002510	33.6197
163	G19	rno-miR-327-001328	35.8995
164	G20	mmu-miR-328-000543	23.1706
165	G21	mmu-miR-329-000192	31.8143
166	G22	mmu-miR-330-002230	31.9482
167	G23	mmu-miR-331-3p-000545	34.9491
168	G24	mmu-miR-331-5p-002233	33.5894
169	H1	rno-miR-333-001329	Undetermined
170	H2	mmu-miR-335-3p-002185	28.4583
171	H3	mmu-miR-335-5p-000546	26.7866
172	H4	rno-miR-336-001331	Undetermined
173	H5	mmu-miR-337-3p-002532	30.4799
174	H6	mmu-miR-337-5p-002515	28.4142
175	H7	mmu-miR-338-3p-002252	30.0704
176	H8	mmu-miR-339-3p-002533	29.5577
177	H9	rno-miR-339-3p-002059	Undetermined
178	H10	mmu-miR-339-5p-002257	30.4388
179	H11	U87-001712	Undetermined
180	H12	mmu-miR-340-3p-002259	28.887
181	H13	mmu-miR-340-5p-002258	26.9514
182	H14	mmu-miR-342-3p-002260	23.4914
183	H15	mmu-miR-342-5p-002527	30.6669
184	H16	rno-miR-343-001344	Undetermined
185	H17	mmu-miR-344-001063	27.9455
186	H18	rno-miR-344-3p-001332	33.8568
187	H19	rno-miR-344-5p-002060	38.2551
188	H20	mmu-miR-345-3p-002529	Undetermined
189	H21	rno-miR-345-3p-002061	32.6769
190	H22	mmu-miR-345-5p-002528	30.4301
191	H23	mmu-miR-346-001064	38.1039
192	H24	rno-miR-346-001333	33.342
193	I1	rno-miR-347-001334	Undetermined
194	I2	rno-miR-349-001335	Undetermined
195	I3	mmu-miR-350-002530	30.4531
196	I4	rno-miR-351-002063	32.9624
197	I5	mmu-miR-361-000554	30.4892
198	I6	mmu-miR-362-3p-002616	32.4932
199	I7	mmu-miR-363-001271	Undetermined
200	I8	mmu-miR-365-001020	27.9724
201	I9	mmu-miR-367-000555	Undetermined
202	I10	mmu-miR-369-3p-000557	34.5832
203	I11	mmu-miR-369-5p-001021	29.5054
204	I12	mmu-miR-370-002275	27.8288
205	I13	mmu-miR-375-000564	32.5173
206	I14	mmu-miR-376a-001069	26.4842
207	I15	mmu-miR-376b-002452	28.6996
208	I16	mmu-miR-376c-002450	30.7818
209	I17	mmu-miR-377-000566	Undetermined
210	I18	rno-miR-377-001320	Undetermined
211	I19	mmu-miR-379-001138	26.8228
212	I20	mmu-miR-380-3p-001071	Undetermined
213	I21	mmu-miR-380-5p-002601	28.3251
214	I22	mmu-miR-381-000571	33.5827
215	I23	mmu-miR-382-000572	25.2634
216	I24	mmu-miR-383-001767	28.121
217	J1	mmu-miR-384-3p-002603	29.9611
218	J2	mmu-miR-384-5p-002602	24.8898
219	J3	mmu-miR-409-3p-002332	26.892
220	J4	mmu-miR-409-5p-002331	30.1487
221	J5	mmu-miR-410-001274	25.9352
222	J6	mmu-miR-411-001610	25.4726
223	J7	rno-miR-421-001343	Undetermined
224	J8	mmu-miR-423-5p-002340	32.792
225	J9	mmu-miR-425-001516	35.772
226	J10	mmu-miR-429-001077	31.3623
227	J11	Y1-001727	Undetermined
228	J12	mmu-miR-431-001979	28.0412
229	J13	mmu-miR-433-001028	27.4749
230	J14	mmu-miR-434-3p-002604	23.4927
231	J15	mmu-miR-434-5p-002581	34.7406
232	J16	mmu-miR-448-001029	30.7467
233	J17	mmu-miR-449a-001030	32.413
234	J18	mmu-miR-449b-002539	Undetermined
235	J19	mmu-miR-450a-5p-002303	34.0543
236	J20	mmu-miR-450b-5p-001962	Undetermined
237	J21	mmu-miR-451-001141	28.4396
238	J22	mmu-miR-453-002484	Undetermined
239	J23	mmu-miR-455-002455	36.8068
240	J24	mmu-miR-465a-3p-002040	Undetermined
241	K1	mmu-miR-465a-5p-001082	Undetermined
242	K2	mmu-miR-465b-5p-002485	Undetermined
243	K3	rno-miR-466b-002066	Undetermined
244	K4	rno-miR-466c-002067	Undetermined
245	K5	mmu-miR-466h-002516	Undetermined
246	K6	mmu-miR-467a-002587	30.7382
247	K7	mmu-miR-467c-002517	39.117
248	K8	mmu-miR-467d-002518	35.1778
249	K9	mmu-miR-467e-002568	34.0256
250	K10	mmu-miR-470-002588	Undetermined
251	K11	mmu-miR-484-001821	23.1179
252	K12	mmu-miR-486-001278	27.166
253	K13	mmu-miR-487b-001285	27.47
254	K14	mmu-miR-489-001302	37.4174
255	K15	mmu-miR-491-001630	28.0859
256	K16	mmu-miR-493-002519	Undetermined
257	K17	mmu-miR-494-002365	29.3495
258	K18	mmu-miR-495-001663	26.246
259	K19	mmu-miR-497-001346	28.5299
260	K20	mmu-miR-499-001352	Undetermined
261	K21	mmu-miR-500-002606	30.6521
262	K22	mmu-miR-501-3p-001651	36.3594
263	K23	mmu-miR-503-002456	32.2975
264	K24	mmu-miR-504-002084	Undetermined
265	L1	mmu-miR-505-001655	Undetermined
266	L2	mmu-miR-509-3p-002521	Undetermined
267	L3	mmu-miR-509-5p-002520	Undetermined
268	L4	mmu-miR-511-002549	33.4653
269	L5	mmu-miR-532-3p-002355	28.2849
270	L6	mmu-miR-532-5p-001518	26.3879
271	L7	rno-miR-532-5p-002051	27.7821
272	L8	mmu-miR-539-001286	27.3411
273	L9	mmu-miR-540-3p-001310	31.352
274	L10	mmu-miR-540-5p-002561	33.1389
275	L11	ath-miR159a-000338	Undetermined
276	L12	mmu-miR-542-3p-001284	Undetermined
277	L13	mmu-miR-542-5p-002563	34.2946
278	L14	mmu-miR-543-002376	28.5088
279	L15	rno-miR-543-002065	Undetermined
280	L16	mmu-miR-544-002550	29.3243
281	L17	mmu-miR-551b-001535	33.1835
282	L18	mmu-miR-574-3p-002349	27.5794
283	L19	mmu-miR-582-3p-002567	34.2254
284	L20	mmu-miR-582-5p-002566	32.9393
285	L21	mmu-miR-590-5p-001984	Undetermined
286	L22	mmu-miR-598-002476	30.2975
287	L23	rno-miR-598-5p-002053	34.9816
288	L24	mmu-miR-615-3p-001960	Undetermined
289	M1	mmu-miR-615-5p-002353	Undetermined
290	M2	mmu-miR-654-3p-002239	Undetermined
291	M3	mmu-miR-654-5p-002522	Undetermined
292	M4	mmu-miR-665-002607	34.1853
293	M5	mmu-miR-666-5p-001952	31.1606
294	M6	mmu-miR-669a-001683	37.7936
295	M7	mmu-miR-671-3p-002322	29.8893
296	M8	mmu-miR-672-002327	28.8536
297	M9	rno-miR-673-002054	Undetermined
298	M10	mmu-miR-674-002021	29.2935
299	M11	mmu-miR-708-002341	27.2747
300	M12	mmu-miR-741-002457	Undetermined
301	M13	mmu-miR-742-002038	Undetermined
302	M14	rno-miR-742-002055	Undetermined
303	M15	mmu-miR-743b-3p-002471	Undetermined
304	M16	mmu-miR-743b-5p-002470	Undetermined
305	M17	mmu-miR-743a-002469	35.6876
306	M18	rno-miR-743b-002068	37.4975
307	M19	mmu-miR-744-002324	27.3613
308	M20	rno-miR-758-001990	31.9753
309	M21	rno-miR-760-5p-002057	Undetermined
310	M22	mmu-miR-770-3p-002027	36.5565
311	M23	mmu-miR-802-002029	Undetermined
312	M24	mmu-miR-871-002354	Undetermined
313	N1	rno-miR-871-002069	Undetermined
314	N2	mmu-miR-872-002264	28.7114
315	N3	mmu-miR-873-002356	34.3576
316	N4	mmu-miR-874-002268	34.6702
317	N5	mmu-miR-875-3p-002547	Undetermined
318	N6	mmu-miR-876-3p-002464	Undetermined
319	N7	mmu-miR-876-5p-002463	Undetermined
320	N8	rno-miR-878-002070	Undetermined
321	N9	mmu-miR-878-5p-002540	Undetermined
322	N10	mmu-miR-879-002472	38.0806
323	N11	mmu-miR-881-002609	Undetermined
324	N12	rno-miR-881-002072	Undetermined
325	N13	mmu-miR-883a-3p-002461	Undetermined
326	N14	mmu-miR-883b-3p-002565	Undetermined
327	N15	mmu-miR-883a-5p-002611	Undetermined
328	N16	mmu-miR-125b-3p-002378	33.621
329	N17	mmu-miR-143-002249	27.4809
330	N18	rno-miR-219-1-3p-002077	Undetermined
331	N19	rno-miR-219-2-3p-002390	29.4706
332	N20	rno-miR-224-000599	34.1587
333	N21	mmu-miR-324-3p-002509	28.0982
334	N22	mmu-miR-351-001067	36.4503
335	N23	rno-miR-381-001322	30.1189
336	N24	rno-miR-409-5p-001317	36.2064
337	O1	rno-miR-450a-001345	Undetermined
338	O2	mmu-miR-452-001032	Undetermined
339	O3	mmu-miR-464-001081	Undetermined
340	O4	mmu-miR-467b-001671	30.1363
341	O5	mmu-miR-468-001085	Undetermined
342	O6	mmu-miR-469-001086	Undetermined
343	O7	mmu-miR-488-001659	31.5725
344	O8	mmu-miR-490-001037	32.5237
345	O9	mmu-miR-496-001953	31.9131
346	O10	rno-miR-505-001316	Undetermined
347	O11	mmu-miR-546-001312	34.894
348	O12	mmu-miR-547-002564	35.3339
349	O13	mmu-miR-652-002352	26.433
350	O14	mmu-miR-667-001949	33.3596
351	O15	mmu-miR-668-001947	33.4811
352	O16	mmu-miR-670-002020	Undetermined
353	O17	mmu-miR-675-3p-001941	Undetermined
354	O18	mmu-miR-675-5p-001940	Undetermined
355	O19	mmu-miR-676-001959	27.9654
356	O20	mmu-miR-677-001660	Undetermined
357	O21	mmu-miR-679-001662	Undetermined
358	O22	mmu-miR-680-001664	35.067
359	O23	mmu-miR-682-001666	Undetermined
360	O24	mmu-miR-683-001668	Undetermined
361	P1	mmu-miR-684-001669	Undetermined
362	P2	mmu-miR-685-001670	30.5908
363	P3	mmu-miR-686-001672	Undetermined
364	P4	mmu-miR-687-001674	37.3143
365	P5	mmu-let-7a-000377	26.9261
366	P6	mmu-let-7f-000382	28.0958
367	P7	mmu-miR-106b-000442	27.7675
368	P8	mmu-miR-155-002571	27.4647
369	P9	mmu-miR-17-002308	24.9615
370	P10	mmu-miR-23a-000399	38.6502
371	P11	mmu-miR-29a-002112	20.9051
372	P12	mmu-miR-30a-000417	24.446
373	P13	mmu-miR-30e-002223	24.311
374	P14	mmu-miR-31-000185	26.459
375	P15	mmu-miR-34b-3p-002618	26.4616
376	P16	mmu-miR-92a-000430	28.0666
377	P17	rno-miR-190b-002048	34.8666
378	P18	mmu-miR-129-5p-000590	29.5885
379	P19	mmu-miR-187-001193	28.4152
380	P20	mmu-miR-188-3p-002106	Undetermined
381	P21	mmu-miR-106a-002459	26.4714
382	P22	mmu-miR-188-5p-002320	31.8725
383	P23	mmu-miR-302b-000531	Undetermined
384	P24	mmu-miR-322-001076	29.5355

## Sheet: LIS contra
Well	Well Position	Target Name	CT
1	A1	mmu-let-7b-000378	28.4161
2	A2	mmu-let-7c-000379	25.3089
3	A3	mmu-let-7d-002283	26.5867
4	A4	mmu-let-7e-002406	24.3819
5	A5	mmu-let-7g-002282	24.9617
6	A6	mmu-let-7i-002221	25.2277
7	A7	mmu-miR-1-002222	32.4022
8	A8	rno-miR-1-002064	32.1193
9	A9	mmu-miR-7a-000268	30.4784
10	A10	mmu-miR-7b-002555	30.6011
11	A11	U6 snRNA-001973	18.7497
12	A12	U6 snRNA-001973	18.425
13	A13	mmu-miR-9-000583	20.7158
14	A14	mmu-miR-10a-000387	33.039
15	A15	mmu-miR-10b-002218	Undetermined
16	A16	mmu-miR-15a-000389	29.3583
17	A17	mmu-miR-15b-000390	30.0118
18	A18	mmu-miR-16-000391	22.9938
19	A19	rno-miR-17-3p-002078	32.1257
20	A20	mmu-miR-18a-002422	32.9966
21	A21	mmu-miR-18b-002466	Undetermined
22	A22	mmu-miR-19a-000395	28.7077
23	A23	mmu-miR-19b-000396	24.9722
24	A24	mmu-miR-20a-000580	28.012
25	B1	mmu-miR-20b-001014	32.9033
26	B2	rno-miR-20b-3p-002052	Undetermined
27	B3	mmu-miR-21-000397	26.9886
28	B4	mmu-miR-23b-000400	30.1567
29	B5	mmu-miR-24-000402	22.2563
30	B6	mmu-miR-25-000403	33.1432
31	B7	mmu-miR-26a-000405	22.4789
32	B8	mmu-miR-26b-000407	25.6813
33	B9	mmu-miR-27a-000408	28.9694
34	B10	mmu-miR-27b-000409	28.4631
35	B11	U6 snRNA-001973	18.7267
36	B12	U6 snRNA-001973	18.1415
37	B13	mmu-miR-28-000411	32.2017
38	B14	mmu-miR-29b-000413	28.0238
39	B15	mmu-miR-29c-000587	31.5057
40	B16	mmu-miR-30b-000602	23.4788
41	B17	mmu-miR-30c-000419	22.4235
42	B18	mmu-miR-30d-000420	25.6654
43	B19	mmu-miR-32-002109	35.4866
44	B20	mmu-miR-34a-000426	28.2386
45	B21	mmu-miR-34c-000428	30.2174
46	B22	mmu-miR-93-001090	27.9708
47	B23	mmu-miR-96-000186	Undetermined
48	B24	mmu-miR-98-000577	32.3896
49	C1	mmu-miR-99a-000435	25.9241
50	C2	mmu-miR-99b-000436	26.23
51	C3	mmu-miR-100-000437	25.4488
52	C4	mmu-miR-101a-002253	29.8415
53	C5	mmu-miR-103-000439	27.4935
54	C6	mmu-miR-105-002465	Undetermined
55	C7	mmu-miR-107-000443	30.8208
56	C8	mmu-miR-122-002245	34.862
57	C9	mmu-miR-124-001182	24.8323
58	C10	mmu-miR-125a-3p-002199	35.2878
59	C11	mmu-miR-125a-5p-002198	25.485
60	C12	mmu-miR-125b-5p-000449	23.0784
61	C13	mmu-miR-126-3p-002228	22.3342
62	C14	mmu-miR-126-5p-000451	27.4251
63	C15	mmu-miR-127-000452	24.0147
64	C16	mmu-miR-128a-002216	25.4583
65	C17	mmu-miR-129-3p-001184	24.8521
66	C18	mmu-miR-130a-000454	30.4186
67	C19	mmu-miR-130b-000456	32.2494
68	C20	mmu-miR-132-000457	21.8544
69	C21	mmu-miR-133a-002246	27.9
70	C22	mmu-miR-133b-002247	33.6484
71	C23	mmu-miR-134-001186	28.5656
72	C24	mmu-miR-135a-000460	26.842
73	D1	mmu-miR-135b-002261	26.1099
74	D2	mmu-miR-136-002511	25.8945
75	D3	mmu-miR-137-001129	27.0167
76	D4	mmu-miR-138-002284	22.5085
77	D5	mmu-miR-139-3p-002546	28.7241
78	D6	mmu-miR-139-5p-002289	23.1484
79	D7	mmu-miR-140-001187	25.8607
80	D8	mmu-miR-141-000463	34.4276
81	D9	mmu-miR-142-3p-000464	29.9709
82	D10	mmu-miR-142-5p-002248	35.3139
83	D11	snoRNA135-001230	27.8784
84	D12	mmu-miR-145-002278	25.3087
85	D13	mmu-miR-146a-000468	25.7226
86	D14	mmu-miR-146b-001097	26.2648
87	D15	mmu-miR-147-002262	Undetermined
88	D16	mmu-miR-148a-000470	30.6292
89	D17	mmu-miR-148b-000471	31.489
90	D18	mmu-miR-150-000473	24.9558
91	D19	mmu-miR-151-3p-001190	29.5282
92	D20	mmu-miR-152-000475	30.0514
93	D21	mmu-miR-153-001191	31.8588
94	D22	mmu-miR-154-000477	33.7426
95	D23	mmu-miR-181a-000480	26.6721
96	D24	mmu-miR-181c-000482	32.5332
97	E1	mmu-miR-182-002599	31.1979
98	E2	mmu-miR-183-002269	33.873
99	E3	mmu-miR-184-000485	32.2173
100	E4	mmu-miR-185-002271	29.8424
101	E5	mmu-miR-186-002285	27.6117
102	E6	mmu-miR-190-000489	32.8181
103	E7	mmu-miR-191-002299	22.3398
104	E8	mmu-miR-192-000491	29.7145
105	E9	mmu-miR-193-002250	34.1781
106	E10	mmu-miR-193b-002467	26.4165
107	E11	mmu-miR-194-000493	29.9025
108	E12	mmu-miR-195-000494	25.9801
109	E13	mmu-miR-196b-002215	Undetermined
110	E14	rno-miR-196c-002049	34.5386
111	E15	mmu-miR-197-000497	35.3972
112	E16	mmu-miR-199a-3p-002304	31.1709
113	E17	mmu-miR-199a-5p-000498	Undetermined
114	E18	mmu-miR-200a-000502	29.4723
115	E19	mmu-miR-200b-002251	29.4325
116	E20	mmu-miR-200c-002300	30.9321
117	E21	mmu-miR-201-002578	Undetermined
118	E22	mmu-miR-202-3p-001195	Undetermined
119	E23	mmu-miR-202-5p-002579	Undetermined
120	E24	mmu-miR-203-000507	29.2809
121	F1	mmu-miR-204-000508	23.2932
122	F2	mmu-miR-205-000509	Undetermined
123	F3	mmu-miR-207-001198	Undetermined
124	F4	rno-miR-207-001315	33.8578
125	F5	mmu-miR-208-000511	Undetermined
126	F6	mmu-miR-208b-002290	Undetermined
127	F7	mmu-miR-210-000512	29.1397
128	F8	mmu-miR-211-001199	34.2638
129	F9	mmu-miR-214-002306	33.5268
130	F10	mmu-miR-215-001200	Undetermined
131	F11	snoRNA202-001232	23.0857
132	F12	mmu-miR-216a-002220	Undetermined
133	F13	mmu-miR-216b-002326	34.807
134	F14	mmu-miR-217-002556	35.0887
135	F15	mmu-miR-218-000521	22.6133
136	F16	mmu-miR-219-000522	29.4572
137	F17	mmu-miR-220-002468	Undetermined
138	F18	mmu-miR-221-000524	26.2893
139	F19	mmu-miR-222-002276	22.6456
140	F20	mmu-miR-223-002295	27.7236
141	F21	mmu-miR-224-002553	35.1944
142	F22	mmu-miR-290-3p-002591	Undetermined
143	F23	mmu-miR-291a-3p-002592	Undetermined
144	F24	mmu-miR-291b-5p-002537	Undetermined
145	G1	mmu-miR-292-3p-002593	Undetermined
146	G2	mmu-miR-293-001794	Undetermined
147	G3	mmu-miR-294-001056	Undetermined
148	G4	mmu-miR-295-000189	35.0699
149	G5	mmu-miR-296-3p-002101	34.6445
150	G6	mmu-miR-296-5p-000527	30.2711
151	G7	mmu-miR-297c-002480	Undetermined
152	G8	mmu-miR-297b-5p-001626	35.2628
153	G9	mmu-miR-298-002598	33.2056
154	G10	mmu-miR-301a-000528	27.8916
155	G11	mmu-miR-301b-002600	28.9735
156	G12	mmu-miR-302a-000529	Undetermined
157	G13	mmu-miR-302c-002558	Undetermined
158	G14	mmu-miR-302d-000535	Undetermined
159	G15	mmu-miR-320-002277	26.9752
160	G16	mmu-miR-323-3p-002227	27.3103
161	G17	mmu-miR-324-5p-000539	29.8777
162	G18	mmu-miR-325-002510	33.9913
163	G19	rno-miR-327-001328	35.2441
164	G20	mmu-miR-328-000543	25.5326
165	G21	mmu-miR-329-000192	33.0895
166	G22	mmu-miR-330-002230	32.9536
167	G23	mmu-miR-331-3p-000545	25.6399
168	G24	mmu-miR-331-5p-002233	33.3924
169	H1	rno-miR-333-001329	33.7421
170	H2	mmu-miR-335-3p-002185	29.439
171	H3	mmu-miR-335-5p-000546	27.7081
172	H4	rno-miR-336-001331	Undetermined
173	H5	mmu-miR-337-3p-002532	30.6346
174	H6	mmu-miR-337-5p-002515	28.7227
175	H7	mmu-miR-338-3p-002252	30.9108
176	H8	mmu-miR-339-3p-002533	30.225
177	H9	rno-miR-339-3p-002059	32.5595
178	H10	mmu-miR-339-5p-002257	30.8726
179	H11	U87-001712	Undetermined
180	H12	mmu-miR-340-3p-002259	29.6544
181	H13	mmu-miR-340-5p-002258	28.2472
182	H14	mmu-miR-342-3p-002260	23.3643
183	H15	mmu-miR-342-5p-002527	31.8809
184	H16	rno-miR-343-001344	Undetermined
185	H17	mmu-miR-344-001063	28.2268
186	H18	rno-miR-344-3p-001332	34.7929
187	H19	rno-miR-344-5p-002060	Undetermined
188	H20	mmu-miR-345-3p-002529	Undetermined
189	H21	rno-miR-345-3p-002061	32.9181
190	H22	mmu-miR-345-5p-002528	31.5665
191	H23	mmu-miR-346-001064	32.6808
192	H24	rno-miR-346-001333	33.9672
193	I1	rno-miR-347-001334	34.2283
194	I2	rno-miR-349-001335	38.0737
195	I3	mmu-miR-350-002530	31.7644
196	I4	rno-miR-351-002063	35.3634
197	I5	mmu-miR-361-000554	31.9819
198	I6	mmu-miR-362-3p-002616	34.0666
199	I7	mmu-miR-363-001271	Undetermined
200	I8	mmu-miR-365-001020	28.831
201	I9	mmu-miR-367-000555	Undetermined
202	I10	mmu-miR-369-3p-000557	34.1769
203	I11	mmu-miR-369-5p-001021	30.411
204	I12	mmu-miR-370-002275	28.3161
205	I13	mmu-miR-375-000564	32.3491
206	I14	mmu-miR-376a-001069	26.753
207	I15	mmu-miR-376b-002452	29.6183
208	I16	mmu-miR-376c-002450	31.6385
209	I17	mmu-miR-377-000566	Undetermined
210	I18	rno-miR-377-001320	Undetermined
211	I19	mmu-miR-379-001138	27.3784
212	I20	mmu-miR-380-3p-001071	34.1704
213	I21	mmu-miR-380-5p-002601	29.3027
214	I22	mmu-miR-381-000571	35.3469
215	I23	mmu-miR-382-000572	26.062
216	I24	mmu-miR-383-001767	28.1471
217	J1	mmu-miR-384-3p-002603	31.292
218	J2	mmu-miR-384-5p-002602	24.6037
219	J3	mmu-miR-409-3p-002332	26.4057
220	J4	mmu-miR-409-5p-002331	31.9608
221	J5	mmu-miR-410-001274	27.6509
222	J6	mmu-miR-411-001610	25.9433
223	J7	rno-miR-421-001343	34.9035
224	J8	mmu-miR-423-5p-002340	Undetermined
225	J9	mmu-miR-425-001516	32.5109
226	J10	mmu-miR-429-001077	29.5851
227	J11	Y1-001727	Undetermined
228	J12	mmu-miR-431-001979	28.194
229	J13	mmu-miR-433-001028	27.7079
230	J14	mmu-miR-434-3p-002604	23.1349
231	J15	mmu-miR-434-5p-002581	34.6571
232	J16	mmu-miR-448-001029	31.2612
233	J17	mmu-miR-449a-001030	32.7316
234	J18	mmu-miR-449b-002539	Undetermined
235	J19	mmu-miR-450a-5p-002303	Undetermined
236	J20	mmu-miR-450b-5p-001962	Undetermined
237	J21	mmu-miR-451-001141	31.6275
238	J22	mmu-miR-453-002484	Undetermined
239	J23	mmu-miR-455-002455	32.573
240	J24	mmu-miR-465a-3p-002040	Undetermined
241	K1	mmu-miR-465a-5p-001082	Undetermined
242	K2	mmu-miR-465b-5p-002485	35.4306
243	K3	rno-miR-466b-002066	Undetermined
244	K4	rno-miR-466c-002067	Undetermined
245	K5	mmu-miR-466h-002516	Undetermined
246	K6	mmu-miR-467a-002587	31.4156
247	K7	mmu-miR-467c-002517	35.0424
248	K8	mmu-miR-467d-002518	34.5719
249	K9	mmu-miR-467e-002568	33.9329
250	K10	mmu-miR-470-002588	Undetermined
251	K11	mmu-miR-484-001821	23.604
252	K12	mmu-miR-486-001278	28.3191
253	K13	mmu-miR-487b-001285	28.0451
254	K14	mmu-miR-489-001302	33.4057
255	K15	mmu-miR-491-001630	28.4586
256	K16	mmu-miR-493-002519	Undetermined
257	K17	mmu-miR-494-002365	29.7786
258	K18	mmu-miR-495-001663	26.8595
259	K19	mmu-miR-497-001346	30.174
260	K20	mmu-miR-499-001352	33.6628
261	K21	mmu-miR-500-002606	31.642
262	K22	mmu-miR-501-3p-001651	33.565
263	K23	mmu-miR-503-002456	33.4374
264	K24	mmu-miR-504-002084	Undetermined
265	L1	mmu-miR-505-001655	Undetermined
266	L2	mmu-miR-509-3p-002521	34.9021
267	L3	mmu-miR-509-5p-002520	Undetermined
268	L4	mmu-miR-511-002549	Undetermined
269	L5	mmu-miR-532-3p-002355	29.2763
270	L6	mmu-miR-532-5p-001518	27.1151
271	L7	rno-miR-532-5p-002051	28.0041
272	L8	mmu-miR-539-001286	26.9051
273	L9	mmu-miR-540-3p-001310	32.3223
274	L10	mmu-miR-540-5p-002561	33.7388
275	L11	ath-miR159a-000338	Undetermined
276	L12	mmu-miR-542-3p-001284	Undetermined
277	L13	mmu-miR-542-5p-002563	35.191
278	L14	mmu-miR-543-002376	29.3484
279	L15	rno-miR-543-002065	Undetermined
280	L16	mmu-miR-544-002550	29.1877
281	L17	mmu-miR-551b-001535	34.181
282	L18	mmu-miR-574-3p-002349	27.9577
283	L19	mmu-miR-582-3p-002567	35.5634
284	L20	mmu-miR-582-5p-002566	32.9868
285	L21	mmu-miR-590-5p-001984	Undetermined
286	L22	mmu-miR-598-002476	31.4424
287	L23	rno-miR-598-5p-002053	35.0514
288	L24	mmu-miR-615-3p-001960	Undetermined
289	M1	mmu-miR-615-5p-002353	Undetermined
290	M2	mmu-miR-654-3p-002239	Undetermined
291	M3	mmu-miR-654-5p-002522	Undetermined
292	M4	mmu-miR-665-002607	33.9417
293	M5	mmu-miR-666-5p-001952	31.9179
294	M6	mmu-miR-669a-001683	35.3953
295	M7	mmu-miR-671-3p-002322	32.3278
296	M8	mmu-miR-672-002327	29.3093
297	M9	rno-miR-673-002054	Undetermined
298	M10	mmu-miR-674-002021	30.9398
299	M11	mmu-miR-708-002341	27.3808
300	M12	mmu-miR-741-002457	Undetermined
301	M13	mmu-miR-742-002038	Undetermined
302	M14	rno-miR-742-002055	Undetermined
303	M15	mmu-miR-743b-3p-002471	Undetermined
304	M16	mmu-miR-743b-5p-002470	Undetermined
305	M17	mmu-miR-743a-002469	Undetermined
306	M18	rno-miR-743b-002068	Undetermined
307	M19	mmu-miR-744-002324	28.3053
308	M20	rno-miR-758-001990	31.7767
309	M21	rno-miR-760-5p-002057	Undetermined
310	M22	mmu-miR-770-3p-002027	33.691
311	M23	mmu-miR-802-002029	33.7502
312	M24	mmu-miR-871-002354	Undetermined
313	N1	rno-miR-871-002069	Undetermined
314	N2	mmu-miR-872-002264	29.462
315	N3	mmu-miR-873-002356	34.7125
316	N4	mmu-miR-874-002268	32.8458
317	N5	mmu-miR-875-3p-002547	Undetermined
318	N6	mmu-miR-876-3p-002464	Undetermined
319	N7	mmu-miR-876-5p-002463	Undetermined
320	N8	rno-miR-878-002070	Undetermined
321	N9	mmu-miR-878-5p-002540	Undetermined
322	N10	mmu-miR-879-002472	Undetermined
323	N11	mmu-miR-881-002609	Undetermined
324	N12	rno-miR-881-002072	Undetermined
325	N13	mmu-miR-883a-3p-002461	Undetermined
326	N14	mmu-miR-883b-3p-002565	Undetermined
327	N15	mmu-miR-883a-5p-002611	Undetermined
328	N16	mmu-miR-125b-3p-002378	33.1929
329	N17	mmu-miR-143-002249	28.2831
330	N18	rno-miR-219-1-3p-002077	Undetermined
331	N19	rno-miR-219-2-3p-002390	29.9696
332	N20	rno-miR-224-000599	35.066
333	N21	mmu-miR-324-3p-002509	29.228
334	N22	mmu-miR-351-001067	32.3135
335	N23	rno-miR-381-001322	30.4358
336	N24	rno-miR-409-5p-001317	32.6336
337	O1	rno-miR-450a-001345	35.3569
338	O2	mmu-miR-452-001032	Undetermined
339	O3	mmu-miR-464-001081	Undetermined
340	O4	mmu-miR-467b-001671	31.4635
341	O5	mmu-miR-468-001085	Undetermined
342	O6	mmu-miR-469-001086	Undetermined
343	O7	mmu-miR-488-001659	31.9195
344	O8	mmu-miR-490-001037	32.5734
345	O9	mmu-miR-496-001953	32.8477
346	O10	rno-miR-505-001316	Undetermined
347	O11	mmu-miR-546-001312	33.9147
348	O12	mmu-miR-547-002564	35.1976
349	O13	mmu-miR-652-002352	27.1508
350	O14	mmu-miR-667-001949	34.0856
351	O15	mmu-miR-668-001947	32.8896
352	O16	mmu-miR-670-002020	Undetermined
353	O17	mmu-miR-675-3p-001941	Undetermined
354	O18	mmu-miR-675-5p-001940	Undetermined
355	O19	mmu-miR-676-001959	27.9779
356	O20	mmu-miR-677-001660	Undetermined
357	O21	mmu-miR-679-001662	Undetermined
358	O22	mmu-miR-680-001664	Undetermined
359	O23	mmu-miR-682-001666	32.9434
360	O24	mmu-miR-683-001668	34.188
361	P1	mmu-miR-684-001669	Undetermined
362	P2	mmu-miR-685-001670	33.3559
363	P3	mmu-miR-686-001672	Undetermined
364	P4	mmu-miR-687-001674	33.1423
365	P5	mmu-let-7a-000377	27.9817
366	P6	mmu-let-7f-000382	28.3573
367	P7	mmu-miR-106b-000442	29.187
368	P8	mmu-miR-155-002571	32.7059
369	P9	mmu-miR-17-002308	26.438
370	P10	mmu-miR-23a-000399	32.3272
371	P11	mmu-miR-29a-002112	21.2099
372	P12	mmu-miR-30a-000417	25.0608
373	P13	mmu-miR-30e-002223	25.132
374	P14	mmu-miR-31-000185	26.8704
375	P15	mmu-miR-34b-3p-002618	26.2769
376	P16	mmu-miR-92a-000430	30.3339
377	P17	rno-miR-190b-002048	35.5443
378	P18	mmu-miR-129-5p-000590	30.3637
379	P19	mmu-miR-187-001193	28.8739
380	P20	mmu-miR-188-3p-002106	Undetermined
381	P21	mmu-miR-106a-002459	28.1418
382	P22	mmu-miR-188-5p-002320	34.4312
383	P23	mmu-miR-302b-000531	Undetermined
384	P24	mmu-miR-322-001076	31.304
