# Supplementary material for: miRNA profile is altered in a modified EAE mouse model of multiple sclerosis featuring cortical lesions
Source: eLife. 2020 Sep 17;9:e56916. doi: 10.7554/eLife.56916 (PMC7498263; doi:10.7554/eLife.56916)
Supplement: Supplementary file 1. [file elife-56916-supp1.xlsx]

## Sheet: Supplementary table 1
All miRNAs expressed
CTL	HIS-C-ipsi	HIS-C-contra	LIS-C-ipsi	LIS-C-contra
mmu-let-7a-000377	mmu-let-7a-000377	mmu-let-7a-000377	mmu-let-7a-000377	mmu-let-7a-000377
mmu-let-7b-000378				mmu-let-7b-000378
mmu-let-7c-000379	mmu-let-7c-000379	mmu-let-7c-000379	mmu-let-7c-000379	mmu-let-7c-000379
mmu-let-7d-002283	mmu-let-7d-002283	mmu-let-7d-002283	mmu-let-7d-002283	mmu-let-7d-002283
mmu-let-7e-002406	mmu-let-7e-002406	mmu-let-7e-002406	mmu-let-7e-002406	mmu-let-7e-002406
mmu-let-7f-000382	mmu-let-7f-000382	mmu-let-7f-000382	mmu-let-7f-000382	mmu-let-7f-000382
mmu-let-7g-002282	mmu-let-7g-002282	mmu-let-7g-002282	mmu-let-7g-002282	mmu-let-7g-002282
mmu-let-7i-002221	mmu-let-7i-002221	mmu-let-7i-002221	mmu-let-7i-002221	mmu-let-7i-002221
			mmu-miR-1-002222
	mmu-miR-7a-000268	mmu-miR-7a-000268	mmu-miR-7a-000268	mmu-miR-7a-000268
mmu-miR-7b-002555	mmu-miR-7b-002555	mmu-miR-7b-002555	mmu-miR-7b-002555	mmu-miR-7b-002555
mmu-miR-9-000583	mmu-miR-9-000583	mmu-miR-9-000583	mmu-miR-9-000583	mmu-miR-9-000583
mmu-miR-15a-000389	mmu-miR-15a-000389	mmu-miR-15a-000389	mmu-miR-15a-000389	mmu-miR-15a-000389
	mmu-miR-15b-000390	mmu-miR-15b-000390	mmu-miR-15b-000390	mmu-miR-15b-000390
mmu-miR-16-000391	mmu-miR-16-000391	mmu-miR-16-000391	mmu-miR-16-000391	mmu-miR-16-000391
mmu-miR-17-002308	mmu-miR-17-002308	mmu-miR-17-002308	mmu-miR-17-002308	mmu-miR-17-002308
	mmu-miR-18a-002422		mmu-miR-18a-002422
mmu-miR-19a-000395	mmu-miR-19a-000395	mmu-miR-19a-000395	mmu-miR-19a-000395	mmu-miR-19a-000395
mmu-miR-19b-000396	mmu-miR-19b-000396	mmu-miR-19b-000396	mmu-miR-19b-000396	mmu-miR-19b-000396
mmu-miR-20a-000580	mmu-miR-20a-000580	mmu-miR-20a-000580	mmu-miR-20a-000580	mmu-miR-20a-000580
	mmu-miR-20b-001014	mmu-miR-20b-001014	mmu-miR-20b-001014
mmu-miR-21-000397	mmu-miR-21-000397	mmu-miR-21-000397	mmu-miR-21-000397	mmu-miR-21-000397
mmu-miR-23b-000400	mmu-miR-23b-000400	mmu-miR-23b-000400	mmu-miR-23b-000400	mmu-miR-23b-000400
mmu-miR-24-000402	mmu-miR-24-000402	mmu-miR-24-000402	mmu-miR-24-000402	mmu-miR-24-000402
	mmu-miR-25-000403	mmu-miR-25-000403	mmu-miR-25-000403
mmu-miR-26a-000405	mmu-miR-26a-000405	mmu-miR-26a-000405	mmu-miR-26a-000405	mmu-miR-26a-000405
mmu-miR-26b-000407	mmu-miR-26b-000407	mmu-miR-26b-000407	mmu-miR-26b-000407	mmu-miR-26b-000407
mmu-miR-27a-000408	mmu-miR-27a-000408	mmu-miR-27a-000408	mmu-miR-27a-000408	mmu-miR-27a-000408
mmu-miR-27b-000409	mmu-miR-27b-000409	mmu-miR-27b-000409	mmu-miR-27b-000409	mmu-miR-27b-000409
	mmu-miR-28-000411	mmu-miR-28-000411	mmu-miR-28-000411
mmu-miR-29a-002112	mmu-miR-29a-002112	mmu-miR-29a-002112	mmu-miR-29a-002112	mmu-miR-29a-002112
mmu-miR-29b-000413		mmu-miR-29b-000413	mmu-miR-29b-000413	mmu-miR-29b-000413
mmu-miR-29c-000587	mmu-miR-29c-000587	mmu-miR-29c-000587	mmu-miR-29c-000587	mmu-miR-29c-000587
mmu-miR-30a-000417	mmu-miR-30a-000417	mmu-miR-30a-000417	mmu-miR-30a-000417	mmu-miR-30a-000417
mmu-miR-30b-000602	mmu-miR-30b-000602	mmu-miR-30b-000602	mmu-miR-30b-000602	mmu-miR-30b-000602
mmu-miR-30c-000419	mmu-miR-30c-000419	mmu-miR-30c-000419	mmu-miR-30c-000419	mmu-miR-30c-000419
mmu-miR-30d-000420	mmu-miR-30d-000420	mmu-miR-30d-000420	mmu-miR-30d-000420	mmu-miR-30d-000420
mmu-miR-30e-002223	mmu-miR-30e-002223	mmu-miR-30e-002223	mmu-miR-30e-002223	mmu-miR-30e-002223
mmu-miR-31-000185	mmu-miR-31-000185	mmu-miR-31-000185	mmu-miR-31-000185	mmu-miR-31-000185
mmu-miR-34a-000426	mmu-miR-34a-000426	mmu-miR-34a-000426	mmu-miR-34a-000426	mmu-miR-34a-000426
mmu-miR-34b-3p-002618	mmu-miR-34b-3p-002618	mmu-miR-34b-3p-002618	mmu-miR-34b-3p-002618	mmu-miR-34b-3p-002618
mmu-miR-34c-000428	mmu-miR-34c-000428	mmu-miR-34c-000428	mmu-miR-34c-000428	mmu-miR-34c-000428
mmu-miR-92a-000430	mmu-miR-92a-000430	mmu-miR-92a-000430	mmu-miR-92a-000430	mmu-miR-92a-000430
mmu-miR-93-001090	mmu-miR-93-001090	mmu-miR-93-001090	mmu-miR-93-001090	mmu-miR-93-001090
	mmu-miR-98-000577	mmu-miR-98-000577	mmu-miR-98-000577
mmu-miR-99a-000435	mmu-miR-99a-000435	mmu-miR-99a-000435	mmu-miR-99a-000435	mmu-miR-99a-000435
mmu-miR-99b-000436	mmu-miR-99b-000436	mmu-miR-99b-000436	mmu-miR-99b-000436	mmu-miR-99b-000436
mmu-miR-100-000437	mmu-miR-100-000437	mmu-miR-100-000437	mmu-miR-100-000437	mmu-miR-100-000437
mmu-miR-101a-002253	mmu-miR-101a-002253	mmu-miR-101a-002253	mmu-miR-101a-002253	mmu-miR-101a-002253
mmu-miR-103-000439	mmu-miR-103-000439	mmu-miR-103-000439	mmu-miR-103-000439	mmu-miR-103-000439
mmu-miR-106a-002459	mmu-miR-106a-002459	mmu-miR-106a-002459	mmu-miR-106a-002459	mmu-miR-106a-002459
mmu-miR-106b-000442	mmu-miR-106b-000442	mmu-miR-106b-000442	mmu-miR-106b-000442	mmu-miR-106b-000442
	mmu-miR-107-000443	mmu-miR-107-000443	mmu-miR-107-000443	mmu-miR-107-000443
mmu-miR-124-001182	mmu-miR-124-001182	mmu-miR-124-001182	mmu-miR-124-001182	mmu-miR-124-001182
mmu-miR-125a-5p-002198	mmu-miR-125a-5p-002198	mmu-miR-125a-5p-002198	mmu-miR-125a-5p-002198	mmu-miR-125a-5p-002198
mmu-miR-125b-5p-000449	mmu-miR-125b-5p-000449	mmu-miR-125b-5p-000449	mmu-miR-125b-5p-000449	mmu-miR-125b-5p-000449
mmu-miR-126-3p-002228	mmu-miR-126-3p-002228	mmu-miR-126-3p-002228	mmu-miR-126-3p-002228	mmu-miR-126-3p-002228
mmu-miR-126-5p-000451	mmu-miR-126-5p-000451	mmu-miR-126-5p-000451	mmu-miR-126-5p-000451	mmu-miR-126-5p-000451
mmu-miR-127-000452	mmu-miR-127-000452	mmu-miR-127-000452	mmu-miR-127-000452	mmu-miR-127-000452
mmu-miR-128a-002216	mmu-miR-128a-002216	mmu-miR-128a-002216	mmu-miR-128a-002216	mmu-miR-128a-002216
mmu-miR-129-3p-001184	mmu-miR-129-3p-001184	mmu-miR-129-3p-001184	mmu-miR-129-3p-001184	mmu-miR-129-3p-001184
	mmu-miR-129-5p-000590	mmu-miR-129-5p-000590	mmu-miR-129-5p-000590	mmu-miR-129-5p-000590
	mmu-miR-130a-000454	mmu-miR-130a-000454	mmu-miR-130a-000454	mmu-miR-130a-000454
	mmu-miR-130b-000456	mmu-miR-130b-000456	mmu-miR-130b-000456
mmu-miR-132-000457	mmu-miR-132-000457	mmu-miR-132-000457	mmu-miR-132-000457	mmu-miR-132-000457
mmu-miR-133a-002246	mmu-miR-133a-002246	mmu-miR-133a-002246	mmu-miR-133a-002246	mmu-miR-133a-002246
		mmu-miR-133b-002247
mmu-miR-134-001186	mmu-miR-134-001186	mmu-miR-134-001186	mmu-miR-134-001186	mmu-miR-134-001186
mmu-miR-135a-000460	mmu-miR-135a-000460	mmu-miR-135a-000460	mmu-miR-135a-000460	mmu-miR-135a-000460
mmu-miR-135b-002261	mmu-miR-135b-002261	mmu-miR-135b-002261	mmu-miR-135b-002261	mmu-miR-135b-002261
mmu-miR-136-002511	mmu-miR-136-002511	mmu-miR-136-002511	mmu-miR-136-002511	mmu-miR-136-002511
mmu-miR-137-001129	mmu-miR-137-001129	mmu-miR-137-001129	mmu-miR-137-001129	mmu-miR-137-001129
mmu-miR-138-002284	mmu-miR-138-002284	mmu-miR-138-002284	mmu-miR-138-002284	mmu-miR-138-002284
mmu-miR-139-3p-002546	mmu-miR-139-3p-002546	mmu-miR-139-3p-002546	mmu-miR-139-3p-002546	mmu-miR-139-3p-002546
mmu-miR-139-5p-002289	mmu-miR-139-5p-002289	mmu-miR-139-5p-002289	mmu-miR-139-5p-002289	mmu-miR-139-5p-002289
mmu-miR-140-001187	mmu-miR-140-001187	mmu-miR-140-001187	mmu-miR-140-001187	mmu-miR-140-001187
	mmu-miR-141-000463
mmu-miR-142-3p-000464	mmu-miR-142-3p-000464	mmu-miR-142-3p-000464	mmu-miR-142-3p-000464	mmu-miR-142-3p-000464
	mmu-miR-142-5p-002248		mmu-miR-142-5p-002248
mmu-miR-143-002249	mmu-miR-143-002249	mmu-miR-143-002249	mmu-miR-143-002249	mmu-miR-143-002249
mmu-miR-145-002278	mmu-miR-145-002278	mmu-miR-145-002278	mmu-miR-145-002278	mmu-miR-145-002278
mmu-miR-146a-000468	mmu-miR-146a-000468	mmu-miR-146a-000468	mmu-miR-146a-000468	mmu-miR-146a-000468
mmu-miR-146b-001097	mmu-miR-146b-001097	mmu-miR-146b-001097	mmu-miR-146b-001097	mmu-miR-146b-001097
	mmu-miR-148a-000470	mmu-miR-148a-000470	mmu-miR-148a-000470	mmu-miR-148a-000470
	mmu-miR-148b-000471	mmu-miR-148b-000471	mmu-miR-148b-000471	mmu-miR-148b-000471
mmu-miR-150-000473	mmu-miR-150-000473	mmu-miR-150-000473	mmu-miR-150-000473	mmu-miR-150-000473
mmu-miR-151-3p-001190	mmu-miR-151-3p-001190	mmu-miR-151-3p-001190	mmu-miR-151-3p-001190	mmu-miR-151-3p-001190
mmu-miR-152-000475	mmu-miR-152-000475	mmu-miR-152-000475	mmu-miR-152-000475	mmu-miR-152-000475
	mmu-miR-153-001191	mmu-miR-153-001191	mmu-miR-153-001191	mmu-miR-153-001191
			mmu-miR-154-000477
mmu-miR-155-002571	mmu-miR-155-002571	mmu-miR-155-002571	mmu-miR-155-002571	mmu-miR-155-002571
mmu-miR-181a-000480	mmu-miR-181a-000480	mmu-miR-181a-000480	mmu-miR-181a-000480	mmu-miR-181a-000480
mmu-miR-182-002599	mmu-miR-182-002599	mmu-miR-182-002599	mmu-miR-182-002599	mmu-miR-182-002599
mmu-miR-184-000485	mmu-miR-184-000485	mmu-miR-184-000485	mmu-miR-184-000485
mmu-miR-185-002271	mmu-miR-185-002271	mmu-miR-185-002271	mmu-miR-185-002271	mmu-miR-185-002271
mmu-miR-186-002285	mmu-miR-186-002285	mmu-miR-186-002285	mmu-miR-186-002285	mmu-miR-186-002285
mmu-miR-187-001193	mmu-miR-187-001193	mmu-miR-187-001193	mmu-miR-187-001193	mmu-miR-187-001193
mmu-miR-188-5p-002320	mmu-miR-188-5p-002320	mmu-miR-188-5p-002320	mmu-miR-188-5p-002320
	mmu-miR-190-000489	mmu-miR-190-000489	mmu-miR-190-000489
mmu-miR-191-002299	mmu-miR-191-002299	mmu-miR-191-002299	mmu-miR-191-002299	mmu-miR-191-002299
mmu-miR-192-000491	mmu-miR-192-000491	mmu-miR-192-000491	mmu-miR-192-000491	mmu-miR-192-000491
mmu-miR-193b-002467	mmu-miR-193b-002467	mmu-miR-193b-002467	mmu-miR-193b-002467	mmu-miR-193b-002467
mmu-miR-194-000493	mmu-miR-194-000493	mmu-miR-194-000493	mmu-miR-194-000493	mmu-miR-194-000493
mmu-miR-195-000494	mmu-miR-195-000494	mmu-miR-195-000494	mmu-miR-195-000494	mmu-miR-195-000494
	mmu-miR-199a-3p-002304	mmu-miR-199a-3p-002304	mmu-miR-199a-3p-002304	mmu-miR-199a-3p-002304
mmu-miR-200a-000502	mmu-miR-200a-000502	mmu-miR-200a-000502	mmu-miR-200a-000502	mmu-miR-200a-000502
mmu-miR-200b-002251	mmu-miR-200b-002251	mmu-miR-200b-002251	mmu-miR-200b-002251	mmu-miR-200b-002251
mmu-miR-200c-002300	mmu-miR-200c-002300	mmu-miR-200c-002300	mmu-miR-200c-002300	mmu-miR-200c-002300
mmu-miR-203-000507	mmu-miR-203-000507	mmu-miR-203-000507	mmu-miR-203-000507	mmu-miR-203-000507
mmu-miR-204-000508	mmu-miR-204-000508	mmu-miR-204-000508	mmu-miR-204-000508	mmu-miR-204-000508
mmu-miR-210-000512	mmu-miR-210-000512	mmu-miR-210-000512	mmu-miR-210-000512	mmu-miR-210-000512
	mmu-miR-214-002306
mmu-miR-218-000521	mmu-miR-218-000521	mmu-miR-218-000521	mmu-miR-218-000521	mmu-miR-218-000521
mmu-miR-219-000522	mmu-miR-219-000522	mmu-miR-219-000522	mmu-miR-219-000522	mmu-miR-219-000522
mmu-miR-221-000524	mmu-miR-221-000524	mmu-miR-221-000524	mmu-miR-221-000524	mmu-miR-221-000524
mmu-miR-222-002276	mmu-miR-222-002276	mmu-miR-222-002276	mmu-miR-222-002276	mmu-miR-222-002276
mmu-miR-223-002295	mmu-miR-223-002295	mmu-miR-223-002295	mmu-miR-223-002295	mmu-miR-223-002295
	mmu-miR-224-002553
mmu-miR-296-5p-000527	mmu-miR-296-5p-000527	mmu-miR-296-5p-000527	mmu-miR-296-5p-000527	mmu-miR-296-5p-000527
mmu-miR-298-002598	mmu-miR-298-002598	mmu-miR-298-002598	mmu-miR-298-002598
mmu-miR-301a-000528	mmu-miR-301a-000528	mmu-miR-301a-000528	mmu-miR-301a-000528	mmu-miR-301a-000528
mmu-miR-301b-002600	mmu-miR-301b-002600	mmu-miR-301b-002600	mmu-miR-301b-002600	mmu-miR-301b-002600
mmu-miR-320-002277	mmu-miR-320-002277	mmu-miR-320-002277	mmu-miR-320-002277	mmu-miR-320-002277
	mmu-miR-322-001076	mmu-miR-322-001076	mmu-miR-322-001076	mmu-miR-322-001076
mmu-miR-323-3p-002227	mmu-miR-323-3p-002227	mmu-miR-323-3p-002227	mmu-miR-323-3p-002227	mmu-miR-323-3p-002227
mmu-miR-324-3p-002509	mmu-miR-324-3p-002509	mmu-miR-324-3p-002509	mmu-miR-324-3p-002509	mmu-miR-324-3p-002509
mmu-miR-324-5p-000539	mmu-miR-324-5p-000539	mmu-miR-324-5p-000539	mmu-miR-324-5p-000539	mmu-miR-324-5p-000539
mmu-miR-328-000543	mmu-miR-328-000543	mmu-miR-328-000543	mmu-miR-328-000543	mmu-miR-328-000543
	mmu-miR-329-000192		mmu-miR-329-000192
		mmu-miR-330-002230	mmu-miR-330-002230
mmu-miR-331-3p-000545	mmu-miR-331-3p-000545	mmu-miR-331-3p-000545		mmu-miR-331-3p-000545
mmu-miR-335-3p-002185	mmu-miR-335-3p-002185	mmu-miR-335-3p-002185	mmu-miR-335-3p-002185	mmu-miR-335-3p-002185
mmu-miR-335-5p-000546	mmu-miR-335-5p-000546	mmu-miR-335-5p-000546	mmu-miR-335-5p-000546	mmu-miR-335-5p-000546
	mmu-miR-337-3p-002532	mmu-miR-337-3p-002532	mmu-miR-337-3p-002532	mmu-miR-337-3p-002532
mmu-miR-337-5p-002515	mmu-miR-337-5p-002515	mmu-miR-337-5p-002515	mmu-miR-337-5p-002515	mmu-miR-337-5p-002515
mmu-miR-338-3p-002252	mmu-miR-338-3p-002252	mmu-miR-338-3p-002252	mmu-miR-338-3p-002252	mmu-miR-338-3p-002252
mmu-miR-339-3p-002533	mmu-miR-339-3p-002533	mmu-miR-339-3p-002533	mmu-miR-339-3p-002533	mmu-miR-339-3p-002533
	mmu-miR-339-5p-002257	mmu-miR-339-5p-002257	mmu-miR-339-5p-002257	mmu-miR-339-5p-002257
mmu-miR-340-3p-002259	mmu-miR-340-3p-002259	mmu-miR-340-3p-002259	mmu-miR-340-3p-002259	mmu-miR-340-3p-002259
mmu-miR-340-5p-002258	mmu-miR-340-5p-002258	mmu-miR-340-5p-002258	mmu-miR-340-5p-002258	mmu-miR-340-5p-002258
mmu-miR-342-3p-002260	mmu-miR-342-3p-002260	mmu-miR-342-3p-002260	mmu-miR-342-3p-002260	mmu-miR-342-3p-002260
mmu-miR-342-5p-002527	mmu-miR-342-5p-002527	mmu-miR-342-5p-002527	mmu-miR-342-5p-002527	mmu-miR-342-5p-002527
mmu-miR-344-001063	mmu-miR-344-001063	mmu-miR-344-001063	mmu-miR-344-001063	mmu-miR-344-001063
	mmu-miR-345-5p-002528	mmu-miR-345-5p-002528	mmu-miR-345-5p-002528	mmu-miR-345-5p-002528
	mmu-miR-350-002530	mmu-miR-350-002530	mmu-miR-350-002530	mmu-miR-350-002530
	mmu-miR-351-001067	mmu-miR-351-001067
mmu-miR-361-000554	mmu-miR-361-000554	mmu-miR-361-000554	mmu-miR-361-000554	mmu-miR-361-000554
	mmu-miR-362-3p-002616
mmu-miR-365-001020	mmu-miR-365-001020	mmu-miR-365-001020	mmu-miR-365-001020	mmu-miR-365-001020
mmu-miR-369-5p-001021	mmu-miR-369-5p-001021	mmu-miR-369-5p-001021	mmu-miR-369-5p-001021	mmu-miR-369-5p-001021
mmu-miR-370-002275	mmu-miR-370-002275	mmu-miR-370-002275	mmu-miR-370-002275	mmu-miR-370-002275
	mmu-miR-375-000564	mmu-miR-375-000564
mmu-miR-376a-001069	mmu-miR-376a-001069	mmu-miR-376a-001069	mmu-miR-376a-001069	mmu-miR-376a-001069
mmu-miR-376b-002452	mmu-miR-376b-002452	mmu-miR-376b-002452	mmu-miR-376b-002452	mmu-miR-376b-002452
mmu-miR-376c-002450	mmu-miR-376c-002450	mmu-miR-376c-002450	mmu-miR-376c-002450	mmu-miR-376c-002450
mmu-miR-379-001138	mmu-miR-379-001138	mmu-miR-379-001138	mmu-miR-379-001138	mmu-miR-379-001138
mmu-miR-380-5p-002601	mmu-miR-380-5p-002601	mmu-miR-380-5p-002601	mmu-miR-380-5p-002601	mmu-miR-380-5p-002601
mmu-miR-382-000572	mmu-miR-382-000572	mmu-miR-382-000572	mmu-miR-382-000572	mmu-miR-382-000572
mmu-miR-383-001767	mmu-miR-383-001767	mmu-miR-383-001767	mmu-miR-383-001767	mmu-miR-383-001767
	mmu-miR-384-3p-002603	mmu-miR-384-3p-002603	mmu-miR-384-3p-002603	mmu-miR-384-3p-002603
mmu-miR-384-5p-002602	mmu-miR-384-5p-002602	mmu-miR-384-5p-002602	mmu-miR-384-5p-002602	mmu-miR-384-5p-002602
mmu-miR-409-3p-002332	mmu-miR-409-3p-002332	mmu-miR-409-3p-002332	mmu-miR-409-3p-002332	mmu-miR-409-3p-002332
	mmu-miR-409-5p-002331	mmu-miR-409-5p-002331	mmu-miR-409-5p-002331	mmu-miR-409-5p-002331
mmu-miR-410-001274	mmu-miR-410-001274	mmu-miR-410-001274	mmu-miR-410-001274	mmu-miR-410-001274
mmu-miR-411-001610	mmu-miR-411-001610	mmu-miR-411-001610	mmu-miR-411-001610	mmu-miR-411-001610
mmu-miR-429-001077	mmu-miR-429-001077	mmu-miR-429-001077	mmu-miR-429-001077	mmu-miR-429-001077
mmu-miR-431-001979	mmu-miR-431-001979	mmu-miR-431-001979	mmu-miR-431-001979	mmu-miR-431-001979
mmu-miR-433-001028	mmu-miR-433-001028	mmu-miR-433-001028	mmu-miR-433-001028	mmu-miR-433-001028
mmu-miR-434-3p-002604	mmu-miR-434-3p-002604	mmu-miR-434-3p-002604	mmu-miR-434-3p-002604	mmu-miR-434-3p-002604
	mmu-miR-448-001029	mmu-miR-448-001029	mmu-miR-448-001029	mmu-miR-448-001029
mmu-miR-449a-001030	mmu-miR-449a-001030
	mmu-miR-451-001141	mmu-miR-451-001141	mmu-miR-451-001141	mmu-miR-451-001141
mmu-miR-467a-002587	mmu-miR-467a-002587	mmu-miR-467a-002587	mmu-miR-467a-002587	mmu-miR-467a-002587
mmu-miR-467b-001671	mmu-miR-467b-001671	mmu-miR-467b-001671	mmu-miR-467b-001671	mmu-miR-467b-001671
mmu-miR-484-001821	mmu-miR-484-001821	mmu-miR-484-001821	mmu-miR-484-001821	mmu-miR-484-001821
mmu-miR-486-001278	mmu-miR-486-001278	mmu-miR-486-001278	mmu-miR-486-001278	mmu-miR-486-001278
mmu-miR-487b-001285	mmu-miR-487b-001285	mmu-miR-487b-001285	mmu-miR-487b-001285	mmu-miR-487b-001285
	mmu-miR-488-001659	mmu-miR-488-001659	mmu-miR-488-001659	mmu-miR-488-001659
mmu-miR-489-001302
	mmu-miR-490-001037	mmu-miR-490-001037
mmu-miR-491-001630	mmu-miR-491-001630	mmu-miR-491-001630	mmu-miR-491-001630	mmu-miR-491-001630
mmu-miR-494-002365	mmu-miR-494-002365	mmu-miR-494-002365	mmu-miR-494-002365	mmu-miR-494-002365
mmu-miR-495-001663	mmu-miR-495-001663	mmu-miR-495-001663	mmu-miR-495-001663	mmu-miR-495-001663
	mmu-miR-496-001953	mmu-miR-496-001953	mmu-miR-496-001953
	mmu-miR-497-001346	mmu-miR-497-001346	mmu-miR-497-001346	mmu-miR-497-001346
mmu-miR-500-002606	mmu-miR-500-002606	mmu-miR-500-002606	mmu-miR-500-002606	mmu-miR-500-002606
mmu-miR-532-3p-002355	mmu-miR-532-3p-002355	mmu-miR-532-3p-002355	mmu-miR-532-3p-002355	mmu-miR-532-3p-002355
mmu-miR-532-5p-001518	mmu-miR-532-5p-001518	mmu-miR-532-5p-001518	mmu-miR-532-5p-001518	mmu-miR-532-5p-001518
mmu-miR-539-001286	mmu-miR-539-001286	mmu-miR-539-001286	mmu-miR-539-001286	mmu-miR-539-001286
mmu-miR-540-3p-001310	mmu-miR-540-3p-001310	mmu-miR-540-3p-001310	mmu-miR-540-3p-001310
mmu-miR-543-002376	mmu-miR-543-002376	mmu-miR-543-002376	mmu-miR-543-002376	mmu-miR-543-002376
mmu-miR-544-002550	mmu-miR-544-002550	mmu-miR-544-002550	mmu-miR-544-002550	mmu-miR-544-002550
mmu-miR-574-3p-002349	mmu-miR-574-3p-002349	mmu-miR-574-3p-002349	mmu-miR-574-3p-002349	mmu-miR-574-3p-002349
mmu-miR-598-002476	mmu-miR-598-002476	mmu-miR-598-002476	mmu-miR-598-002476	mmu-miR-598-002476
mmu-miR-652-002352	mmu-miR-652-002352	mmu-miR-652-002352	mmu-miR-652-002352	mmu-miR-652-002352
			mmu-miR-666-5p-001952	mmu-miR-666-5p-001952
mmu-miR-667-001949
	mmu-miR-671-3p-002322	mmu-miR-671-3p-002322	mmu-miR-671-3p-002322
mmu-miR-672-002327	mmu-miR-672-002327	mmu-miR-672-002327	mmu-miR-672-002327	mmu-miR-672-002327
mmu-miR-674-002021	mmu-miR-674-002021	mmu-miR-674-002021	mmu-miR-674-002021	mmu-miR-674-002021
mmu-miR-676-001959	mmu-miR-676-001959	mmu-miR-676-001959	mmu-miR-676-001959	mmu-miR-676-001959
mmu-miR-685-001670	mmu-miR-685-001670	mmu-miR-685-001670	mmu-miR-685-001670
mmu-miR-687-001674
mmu-miR-708-002341	mmu-miR-708-002341	mmu-miR-708-002341	mmu-miR-708-002341	mmu-miR-708-002341
mmu-miR-744-002324	mmu-miR-744-002324	mmu-miR-744-002324	mmu-miR-744-002324	mmu-miR-744-002324
mmu-miR-872-002264	mmu-miR-872-002264	mmu-miR-872-002264	mmu-miR-872-002264	mmu-miR-872-002264
	rno-miR-1-002064	rno-miR-1-002064	rno-miR-1-002064
	rno-miR-219-2-3p-002390	rno-miR-219-2-3p-002390	rno-miR-219-2-3p-002390	rno-miR-219-2-3p-002390
rno-miR-347-001334
rno-miR-381-001322	rno-miR-381-001322	rno-miR-381-001322	rno-miR-381-001322	rno-miR-381-001322
	rno-miR-409-5p-001317	rno-miR-409-5p-001317
rno-miR-532-5p-002051	rno-miR-532-5p-002051	rno-miR-532-5p-002051	rno-miR-532-5p-002051	rno-miR-532-5p-002051
rno-miR-758-001990	rno-miR-758-001990	rno-miR-758-001990	rno-miR-758-001990	rno-miR-758-001990
