# Supplementary material for: miRNA profile is altered in a modified EAE mouse model of multiple sclerosis featuring cortical lesions
Source: eLife. 2020 Sep 17;9:e56916. doi: 10.7554/eLife.56916 (PMC7498263; doi:10.7554/eLife.56916)
Supplement: Supplementary file 2. [file elife-56916-supp2.xlsx]

## Sheet: Supplementary table 2
miRNA variations vs CTL
	HIS-C-ipsi	HIS-C-contra	LIS-C-ipsi	LIS-C-contra
mmu-let-7a-000377	13.0487	11.2039	11.2101	5.59992
mmu-let-7b-000378				2.91006
mmu-let-7c-000379	9.31827	9.86059	18.7727	5.91472
mmu-let-7d-002283	15.2172	14.5526	10.6236	7.11001
mmu-let-7e-002406	7.98377	6.43969	7.39456	5.32764
mmu-let-7f-000382	8.96366	8.6168	8.54391	7.40063
mmu-let-7g-002282	7.99023	6.62975	7.5408	4.8366
mmu-let-7i-002221	11.4636	10.8804	11.4632	5.92139
mmu-miR-7b-002555	63.7618	4.51935	4.38484	4.01028
mmu-miR-9-000583	9.63517	10.8474	12.5404	5.10944
mmu-miR-15a-000389	15.1908	13.0993	10.3135	4.37709
mmu-miR-16-000391	1.82476	1.7656	1.83901	1.13743
mmu-miR-17-002308	7.57106	6.25339	7.8948	2.9459
mmu-miR-19a-000395	26.8869	15.0109	20.4858	7.09492
mmu-miR-19b-000396	22.9893	18.0067	20.3854	6.73897
mmu-miR-20a-000580	20.5922	16.3028	16.3513	5.67537
mmu-miR-21-000397	90.9827	58.4825	126.215	12.1675
mmu-miR-23b-000400	17.1306	17.1643	14.4118	6.3928
mmu-miR-24-000402	3.7125	4.06689	3.2193	1.89454
mmu-miR-26a-000405	9.56524	9.94584	7.54063	6.30108
mmu-miR-26b-000407	13.7237	10.2889	9.57696	6.35253
mmu-miR-27a-000408	27.0436	22.8442	22.9916	9.46674
mmu-miR-27b-000409	40.1402	31.6455	38.319	18.7648
mmu-miR-29a-002112	5.1848	5.17828	3.99321	3.35682
mmu-miR-29b-000413		15.6487	9.07106	6.03878
mmu-miR-29c-000587	2.19651	2.2186	1.56107	0.268991
mmu-miR-30a-000417	5.96766	6.43961	6.60796	4.48048
mmu-miR-30b-000602	8.13865	7.99693	7.56582	4.83678
mmu-miR-30c-000419	7.43885	8.42383	7.20774	4.62616
mmu-miR-30d-000420	5.3362	5.8597	5.11943	4.15352
mmu-miR-30e-002223	5.64707	5.85467	6.16192	3.62156
mmu-miR-31-000185	3.12909	2.98666	3.30257	2.57851
mmu-miR-34a-000426	22.0492	21.656	19.0307	7.20849
mmu-miR-34b-3p-002618	1.44736	3.97306	3.26556	3.85413
mmu-miR-34c-000428	6.88709	22.6084	13.9291	7.79798
mmu-miR-92a-000430	20.4642	10.1096	23.3075	5.02726
mmu-miR-93-001090	15.2352	16.3744	11.2988	5.75951
mmu-miR-99a-000435	14.7379	18.93	17.3223	6.67725
mmu-miR-99b-000436	10.6875	13.7903	20.0273	7.95675
mmu-miR-100-000437	14.788	15.8445	19.9768	9.16037
mmu-miR-101a-002253	5.6334	6.18377	4.9229	3.29305
mmu-miR-103-000439	9.64114	11.3207	7.92553	5.06536
mmu-miR-106a-002459	6.89718	7.24123	8.35001	2.72386
mmu-miR-106b-000442	16.3033	10.8107	13.8329	5.36966
mmu-miR-124-001182	13.6095	12.1047	9.00162	6.3981
mmu-miR-125a-5p-002198	0.902889	1.55718	0.713629	0.822264
mmu-miR-125b-5p-000449	15.0448	17.72	13.5772	7.46894
mmu-miR-126-3p-002228	3.05402	2.71429	1.91376	1.70929
mmu-miR-126-5p-000451	11.8345	10.8669	8.82142	3.40114
mmu-miR-127-000452	14.6575	12.514	11.5164	10.5285
mmu-miR-128a-002216	28.6149	28.5402	22.5971	8.66819
mmu-miR-129-3p-001184	11.4847	12.5853	11.1364	7.10042
mmu-miR-132-000457	10.1328	12.0441	9.08404	3.47235
mmu-miR-133a-002246	1.25169	1.57221	1.28002	1.55153
mmu-miR-134-001186	1.58775	1.26155	0.828718	1.09397
mmu-miR-135a-000460	10.3506	11.3374	4.53486	9.69538
mmu-miR-135b-002261	14.2823	8.64228	6.63783	8.832
mmu-miR-136-002511	3.7999	3.96252	4.48597	2.91241
mmu-miR-137-001129	11.0728	11.7795	10.2669	6.3244
mmu-miR-138-002284	0.830687	1.34262	0.932655	0.889763
mmu-miR-139-3p-002546	2.303	2.15485	1.78262	1.87623
mmu-miR-139-5p-002289	2.23239	3.70333	2.12085	2.38461
mmu-miR-140-001187	5.91674	7.07738	6.2176	4.83868
mmu-miR-142-3p-000464	128.741	63.8167	125.255	4.92327
mmu-miR-143-002249	12.9614	13.5172	10.3596	6.16918
mmu-miR-145-002278	14.4818	19.8089	14.7565	8.55741
mmu-miR-146a-000468	6.65147	7.23861	5.05015	1.89467
mmu-miR-146b-001097	2.01144	2.22775	1.60313	1.33326
mmu-miR-150-000473	1.65826	1.75319	1.77563	1.4693
mmu-miR-151-3p-001190	5.31575	6.57796	6.47534	3.57091
mmu-miR-152-000475	38.243	12.654	10.1987	6.91221
mmu-miR-155-002571	19.0293	7.94411	38.065	1.81946
mmu-miR-181a-000480	22.942	21.2554	28.4393	8.93447
mmu-miR-182-002599	3.53021	0.56236	0.569067	0.972039
mmu-miR-184-000485	1.07901	0.949742	0.839898
mmu-miR-185-002271	7.1266	8.32702	5.10617	4.05182
mmu-miR-186-002285	1.35351	1.99597	1.15055	1.00103
mmu-miR-187-001193	0.646273	1.31171	1.12411	0.849316
mmu-miR-188-5p-002320	2.39627	2.23393	2.31502
mmu-miR-191-002299	1.44123	1.78971	1.16797	1.72236
mmu-miR-192-000491	3.1528	3.50399	2.23615	3.10155
mmu-miR-193b-002467	0.976626	1.64955	1.33768	1.03241
mmu-miR-194-000493	4.69814	6.77241	5.72941	5.95141
mmu-miR-195-000494	10.8796	11.2466	9.10467	5.99905
mmu-miR-200a-000502	7.05629	0.552717	0.400274	0.957231
mmu-miR-200b-002251	12.2066	0.577332	0.330475	1.0588
mmu-miR-200c-002300	34.862	0.349542	0.332886	0.683944
mmu-miR-203-000507	7.2069	6.28763	4.74988	2.51837
mmu-miR-204-000508	3.28974	9.57151	8.62712	8.3401
mmu-miR-210-000512	3.02939	2.54725	3.78756	1.09377
mmu-miR-218-000521	5.06233	6.20072	5.41905	4.67679
mmu-miR-219-000522	9.25372	12.1942	11.2476	4.69953
mmu-miR-221-000524	19.1172	20.1206	19.1184	9.86551
mmu-miR-222-002276	1.75002	2.16263	1.32756	1.13088
mmu-miR-223-002295	214.838	17.4753	41.8172	5.20064
mmu-miR-296-5p-000527	20.5634	26.2666	15.4014	4.91883
mmu-miR-298-002598	2.98829	1.836	1.79102
mmu-miR-301a-000528	5.4221	5.5897	3.57239	2.81729
mmu-miR-301b-002600	9.35715	9.63037	8.17562	4.61179
mmu-miR-320-002277	0.848491	0.777228	0.955961	0.92306
mmu-miR-323-3p-002227	7.97909	9.01081	6.41856	5.27746
mmu-miR-324-3p-002509	5.77777	5.84882	6.02669	2.85974
mmu-miR-324-5p-000539	16.5854	19.2059	11.644	9.63242
mmu-miR-328-000543	28.4483	26.2529	35.4699	7.16428
mmu-miR-331-3p-000545	3.02082	3.81917		2.106
mmu-miR-335-3p-002185	11.6955	7.50155	7.01055	3.68875
mmu-miR-335-5p-000546	9.1654	4.79722	6.19435	3.39574
mmu-miR-337-5p-002515	6.81184	6.20412	4.21143	3.53086
mmu-miR-338-3p-002252	5.46859	8.53955	6.2319	3.61393
mmu-miR-339-3p-002533	1.75388	1.54614	1.72167	1.12573
mmu-miR-340-3p-002259	13.5837	13.503	10.5082	6.41016
mmu-miR-340-5p-002258	17.113	13.9213	15.7115	6.64507
mmu-miR-342-3p-002260	0.934336	1.24921	0.910995	1.0331
mmu-miR-342-5p-002527	2.70398	3.19856	2.61567	1.17081
mmu-miR-344-001063	6.02838	6.49424	5.00375	4.27521
mmu-miR-361-000554	4.23077	5.33076	4.95526	1.82829
mmu-miR-365-001020	15.9225	16.2414	17.9261	10.2655
mmu-miR-369-5p-001021	10.0247	6.84815	8.54592	4.73705
mmu-miR-370-002275	3.80382	3.45216	3.0334	2.24678
mmu-miR-376a-001069	5.40039	5.55027	5.83974	5.03315
mmu-miR-376b-002452	12.534	12.5602	10.0868	5.54045
mmu-miR-376c-002450	4.78174	4.10327	1.6071	0.921513
mmu-miR-379-001138	6.5731	5.54258	4.53161	3.20133
mmu-miR-380-5p-002601	4.18333	3.66331	3.62248	1.9101
mmu-miR-382-000572	5.37975	4.89568	4.96216	2.96236
mmu-miR-383-001767	1.00627	1.37568	0.768147	0.783348
mmu-miR-384-5p-002602	1.70758	2.14933	1.36801	1.73199
mmu-miR-409-3p-002332	2.24818	2.19682	1.53201	2.22838
mmu-miR-410-001274	2.03084	2.10305	4.08689	1.29178
mmu-miR-411-001610	5.51183	5.49242	4.43571	3.32371
mmu-miR-429-001077	2.89512	0.192426	0.112818	0.401525
mmu-miR-431-001979	3.25278	2.28661	1.12024	1.04633
mmu-miR-433-001028	2.51502	2.67415	2.14795	1.89772
mmu-miR-434-3p-002604	11.3839	14.6743	7.9186	10.5369
mmu-miR-449a-001030	1.39372
mmu-miR-467a-002587	5.30653	5.21489	3.88497	2.52229
mmu-miR-467b-001671	4.12709	3.27549	6.52267	2.69938
mmu-miR-484-001821	1.99078	2.47362	2.22897	1.65238
mmu-miR-486-001278	4.60077	2.0687	4.09083	1.90997
mmu-miR-487b-001285	6.30326	6.27433	5.17233	3.60517
mmu-miR-491-001630	3.80989	4.58684	3.09784	2.48423
mmu-miR-494-002365	1.98171	1.50602	1.71902	1.32571
mmu-miR-495-001663	12.4266	11.5064	9.85787	6.69061
mmu-miR-500-002606	1.77077	2.92724	5.27101	2.75573
mmu-miR-532-3p-002355	7.28551	8.77047	7.63009	3.98497
mmu-miR-532-5p-001518	9.25273	11.1968	9.29107	5.82758
mmu-miR-539-001286	2.13822	2.463	1.59611	2.24211
mmu-miR-540-3p-001310	4.74934	3.85717	3.11963
mmu-miR-543-002376	17.7392	18.2996	17.58	10.2004
mmu-miR-544-002550	4.615	4.15251	3.59216	4.10056
mmu-miR-574-3p-002349	4.69438	2.9854	2.22583	1.77819
mmu-miR-598-002476	29.2272	21.62	7.13024	3.34813
mmu-miR-652-002352	10.8338	12.8171	9.49766	5.9962
mmu-miR-672-002327	2.30266	0.973114	0.999766	0.756904
mmu-miR-674-002021	6.37001	5.02788	5.85567	1.94228
mmu-miR-676-001959	3.78544	3.03469	2.7669	2.84827
mmu-miR-685-001670	2.06722	2.1179	4.21547
mmu-miR-708-002341	11.1087	10.6025	6.82933	6.58845
mmu-miR-744-002324	6.14034	6.40499	5.58683	3.01525
mmu-miR-872-002264	6.65527	7.19362	5.72009	3.53008
rno-miR-381-001322	16.6254	12.1	8.18694	6.82464
rno-miR-532-5p-002051	10.3625	13.1891	8.3196	7.40659
rno-miR-758-001990	6.10076	5.576	2.25365	2.68488
