# Supplementary material for: miRNA profile is altered in a modified EAE mouse model of multiple sclerosis featuring cortical lesions
Source: eLife. 2020 Sep 17;9:e56916. doi: 10.7554/eLife.56916 (PMC7498263; doi:10.7554/eLife.56916)
Supplement: Supplementary file 3. [file elife-56916-supp3.xlsx]

## Sheet: Supplementary table 3
		HIS-C-ipsi vs LIS-C-ipsi	HIS-C-contra vs LIS-C-contra
	mmu-let-7a-000377	1.16401	2.00072
	mmu-let-7c-000379	0.496374	1.66713
	mmu-let-7d-002283	1.4324	2.04678
	mmu-let-7e-002406	1.07968	1.20873
	mmu-let-7f-000382	1.04913	1.16433
	mmu-let-7g-002282	1.0596	1.37074
	mmu-let-7i-002221	1.00003	1.83747
	mmu-miR-7a-000268	20.3693	1.25767
	mmu-miR-7b-002555	14.5414	1.12694
	mmu-miR-9-000583	0.768333
	mmu-miR-15a-000389	1.4729	2.99268
	mmu-miR-15b-000390	0.86936	2.47631
	mmu-miR-16-000391	0.992255	1.55228
	mmu-miR-17-002308	0.958993	2.12274
	mmu-miR-18a-002422	0.656349
	mmu-miR-19a-000395	1.31246	2.11573
	mmu-miR-19b-000396	1.12773	2.67202
	mmu-miR-20a-000580	1.25937	2.87256
	mmu-miR-20b-001014	0.910921
	mmu-miR-21-000397	0.720853	4.80645
	mmu-miR-23b-000400	1.18865	2.68494
	mmu-miR-24-000402	1.1532	2.14664
	mmu-miR-25-000403	0.767251
	mmu-miR-26a-000405	1.26849	1.57843
	mmu-miR-26b-000407	1.43299	1.61965
	mmu-miR-27a-000408	1.17624	2.4131
	mmu-miR-27b-000409	1.04753	1.68643
	mmu-miR-28-000411	1.25854
	mmu-miR-29a-002112	1.29841	1.54261
	mmu-miR-29b-000413		2.59137
	mmu-miR-29c-000587	1.40705	8.24787
	mmu-miR-30a-000417	0.903102	1.43726
	mmu-miR-30b-000602	1.07571	1.65336
	mmu-miR-30c-000419	1.03207	1.82091
	mmu-miR-30d-000420	1.04234	1.41078
	mmu-miR-30e-002223	0.916447	1.61662
	mmu-miR-31-000185	0.947472	1.15829
	mmu-miR-34a-000426	1.15861	3.00424
	mmu-miR-34b-3p-002618	0.443221	1.03086
	mmu-miR-34c-000428	0.494438	2.89926
	mmu-miR-92a-000430	0.87801
	mmu-miR-93-001090	1.3484
	mmu-miR-98-000577	0.626516
	mmu-miR-99a-000435	0.850805
	mmu-miR-99b-000436	0.533649
	mmu-miR-100-000437	0.740257	1.72968
	mmu-miR-101a-002253	1.14433	1.87782
	mmu-miR-103-000439	1.21647	2.23493
	mmu-miR-106a-002459	0.826009	2.65845
	mmu-miR-106b-000442	1.17859	2.01329
	mmu-miR-107-000443	1.63542	1.23665
	mmu-miR-124-001182	1.5119	1.89192
	mmu-miR-125a-5p-002198	1.26521	1.89376
	mmu-miR-125b-5p-000449	1.10809	2.37249
	mmu-miR-126-3p-002228	1.59583	1.58797
	mmu-miR-126-5p-000451	1.34156	3.19507
	mmu-miR-127-000452	1.27275	1.18858
	mmu-miR-128a-002216	1.26631	3.29252
	mmu-miR-129-3p-001184	1.03128	1.77247
	mmu-miR-129-5p-000590	1.07075	1.67739
	mmu-miR-130a-000454	1.03025	1.84205
	mmu-miR-130b-000456	1.08008
	mmu-miR-132-000457	1.11545	3.46858
	mmu-miR-133a-002246	0.977866	1.01333
	mmu-miR-134-001186	1.91591	1.15318
	mmu-miR-135a-000460	2.28245	1.16936
	mmu-miR-135b-002261	2.15165	0.978519
	mmu-miR-136-002511	0.847062	1.36056
	mmu-miR-137-001129	1.07849	1.86255
	mmu-miR-138-002284	0.890668	1.50896
	mmu-miR-139-3p-002546	1.29192	1.1485
	mmu-miR-139-5p-002289	1.05259	1.55301
	mmu-miR-140-001187	0.951611	1.46267
	mmu-miR-142-3p-000464	1.02783	12.9622
	mmu-miR-142-5p-002248	1.16951	2.19109
	mmu-miR-143-002249	1.25115
	mmu-miR-145-002278	0.981387	2.31482
	mmu-miR-146a-000468	1.31708	3.82051
	mmu-miR-146b-001097	1.2547	1.67091
	mmu-miR-148a-000470	3.97969	2.30481
	mmu-miR-148b-000471	0.904507	1.95494
	mmu-miR-150-000473	0.933903	1.19322
	mmu-miR-151-3p-001190	0.820923	1.8421
	mmu-miR-152-000475	3.74978	1.83067
	mmu-miR-153-001191	0.626846	2.00756
	mmu-miR-155-002571	0.499916	4.36619
	mmu-miR-181a-000480	0.8067	2.37903
	mmu-miR-182-002599	6.2035	0.578537
	mmu-miR-184-000485	1.28469
	mmu-miR-185-002271	1.39568	2.05513
	mmu-miR-186-002285	1.17639	1.99392
	mmu-miR-187-001193	0.574921	1.54443
	mmu-miR-188-5p-002320	1.0351
	mmu-miR-190-000489	1.32412
	mmu-miR-191-002299	1.23395	1.03911
	mmu-miR-192-000491	1.40992	1.12975
	mmu-miR-193b-002467	0.730088	1.59778
	mmu-miR-194-000493	0.820004	1.13795
	mmu-miR-195-000494	1.19495	1.87473
	mmu-miR-199a-3p-002304	1.09151	1.53008
	mmu-miR-200a-000502	17.6287	0.577412
	mmu-miR-200b-002251	36.9365	0.54527
	mmu-miR-200c-002300	104.727	0.511067
	mmu-miR-203-000507	1.51728	2.4967
	mmu-miR-204-000508	0.381325	1.14765
	mmu-miR-210-000512	0.799827	2.32887
	mmu-miR-218-000521	0.934173	1.32585
	mmu-miR-219-000522	0.822729	2.59477
	mmu-miR-221-000524	0.999937	2.03949
	mmu-miR-222-002276	1.31822	1.91234
	mmu-miR-223-002295	5.13756	3.36023
	mmu-miR-296-5p-000527	1.33517	5.34001
	mmu-miR-298-002598	1.66849
	mmu-miR-301a-000528	1.51778	1.98407
	mmu-miR-301b-002600	1.14452	2.08821
	mmu-miR-320-002277	0.887579	0.842012
	mmu-miR-322-001076	0.797246	2.23463
	mmu-miR-323-3p-002227	1.24313	1.70742
	mmu-miR-324-3p-002509	0.958698	2.04523
	mmu-miR-324-5p-000539	1.42438	1.99388
	mmu-miR-328-000543	0.802041	3.66441
	mmu-miR-329-000192	1.05712
	mmu-miR-331-3p-000545		1.81347
	mmu-miR-335-3p-002185	1.66827	2.03363
	mmu-miR-335-5p-000546	1.47964	1.41272
	mmu-miR-337-3p-002532	1.95253	1.74795
	mmu-miR-337-5p-002515	1.61747	1.75711
	mmu-miR-338-3p-002252	0.877516	2.36296
	mmu-miR-339-3p-002533	1.01871	1.37346
	mmu-miR-339-5p-002257	1.97409	1.27313
	mmu-miR-340-3p-002259	1.29268	2.1065
	mmu-miR-340-5p-002258	1.08921	2.09497
	mmu-miR-342-3p-002260	1.02562	1.20919
	mmu-miR-342-5p-002527	1.03376	2.73191
	mmu-miR-344-001063	1.20477	1.51905
	mmu-miR-345-5p-002528	0.910564	1.51754
	mmu-miR-350-002530	1.17514	1.65263
	mmu-miR-361-000554	0.853794	2.91571
	mmu-miR-365-001020	0.888232	1.58213
	mmu-miR-369-5p-001021	1.17304	1.44566
	mmu-miR-370-002275	1.25398	1.53649
	mmu-miR-376a-001069	0.924765	1.10274
	mmu-miR-376b-002452	1.24261	2.26701
	mmu-miR-376c-002450	2.97538	4.45276
	mmu-miR-379-001138	1.4505	1.73134
	mmu-miR-380-5p-002601	1.15482	1.91786
	mmu-miR-382-000572	1.08416	1.65263
	mmu-miR-383-001767	1.30999	1.75616
	mmu-miR-384-3p-002603	1.2139	4.18538
	mmu-miR-384-5p-002602	1.24822	1.24096
	mmu-miR-409-3p-002332	1.46747	0.985836
	mmu-miR-409-5p-002331	0.706571	3.01192
	mmu-miR-410-001274	0.496916	1.62803
	mmu-miR-411-001610	1.2426	1.6525
	mmu-miR-429-001077	25.6617	0.479239
	mmu-miR-431-001979	2.90364	2.18537
	mmu-miR-433-001028	1.17089	1.40914
	mmu-miR-434-3p-002604	1.43762	1.39266
	mmu-miR-448-001029	0.362066	1.6821
	mmu-miR-451-001141	1.13674	2.67501
	mmu-miR-467a-002587	1.36591	2.06752
	mmu-miR-467b-001671	0.632729	1.21342
	mmu-miR-484-001821	0.893139	1.497
	mmu-miR-486-001278	1.12465	1.08311
	mmu-miR-487b-001285	1.21865	1.74037
	mmu-miR-488-001659	1.34102	1.54691
	mmu-miR-491-001630	1.22985	1.84638
	mmu-miR-494-002365	1.15281	1.13601
	mmu-miR-495-001663	1.26058	1.71979
	mmu-miR-496-001953	1.16715
	mmu-miR-497-001346	1.11784	2.80064
	mmu-miR-500-002606	0.335946	1.06224
	mmu-miR-532-3p-002355	0.95484	2.20089
	mmu-miR-532-5p-001518	0.995873	1.92135
	mmu-miR-539-001286	1.33964	1.09852
	mmu-miR-540-3p-001310	1.5224
	mmu-miR-543-002376	1.00906	1.794
	mmu-miR-544-002550	1.28474	1.01267
	mmu-miR-574-3p-002349	2.10905	1.6789
	mmu-miR-598-002476	4.09906	6.45733
	mmu-miR-652-002352	1.14068	2.13754
	mmu-miR-671-3p-002322	0.912737
	mmu-miR-672-002327	2.30319	1.28565
	mmu-miR-674-002021	1.08784	2.58864
	mmu-miR-676-001959	1.36812	1.06545
	mmu-miR-685-001670	0.490388
	mmu-miR-708-002341	1.62661	1.60926
	mmu-miR-744-002324	1.09907	2.1242
	mmu-miR-872-002264	1.16349	2.0378
	mmu-miR-9-000583		2.12302
	mmu-miR-92a-000430		2.01095
	mmu-miR-93-001090		2.84302
	mmu-miR-99a-000435		2.83499
	mmu-miR-99b-000436		1.73316
	rno-miR-1-002064	1.05493
	rno-miR-219-2-3p-002390	0.876946	1.26771
	rno-miR-381-001322	2.03072	1.77298
	rno-miR-532-5p-002051	1.24556	1.78073
	rno-miR-758-001990	2.70705	2.07681
